# Supplementary material for: Living on the edge: Response of rudist bivalves (Hippuritida) to hot and highly seasonal climate in the low-latitude Saiwan site, Oman
Source: Copernicus journal article supplement (doi:10.5194/egusphere-2025-2308), 2025-06-02
Supplement: Supplementary file [file egusphere-2025-2308-RC2-supplement.pdf]

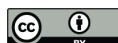

**1 Living on the edge: Response of rudist bivalves (Hippuritida) to hot and highly seasonal climate in the**  
**2 low-latitude Saiwan site, Oman**

3 Niels J. de Winter<sup>1,2</sup>, Najat al Fudhaili<sup>3</sup>, Iris Arndt<sup>4</sup>, Philippe Claeys<sup>2</sup>, René Fraaije<sup>5</sup>, Steven Goderis<sup>2</sup>, John  
4 Jagt<sup>6</sup>, Matthias López Correa<sup>7</sup>, Axel Munnecke<sup>7</sup>, Jarosław Stolarski<sup>8</sup>, Martin Ziegler<sup>9</sup>

5

**6 Affiliations**

- 7 1. Department of Earth Sciences, Vrije Universiteit Amsterdam, the Netherlands  
8 2. Archaeology, Environmental Changes and Geo-Chemistry, Vrije Universiteit Brussel, Belgium  
9 3. Industrial Innovation Academy LLC, Muscat, Oman  
10 4. AG Geology and Paleoenvironmental research, Institut für Geowissenschaften, Goethe Universität  
11 Frankfurt, Germany  
12 5. Oertijdmuseum Boxtel, the Netherlands  
13 6. Natuurhistorisch Museum Maastricht, the Netherlands  
14 7. GeoZentrum Nordbayern, Friedrich-Alexander Universität, Erlangen, Germany  
15 8. Department of Environmental Paleontology, Institute of Paleobiology, Polish Academy of Science,  
16 Warsaw, Poland  
17 9. Department of Earth Sciences, Utrecht University, the Netherlands

18

19 Corresponding author: Niels J. de Winter ([n.j.de.winter@vu.nl](mailto:n.j.de.winter@vu.nl))

20

**21 Abstract**

22 Earth's climate history serves as a natural laboratory for testing the effect of warm climates on the  
23 biosphere. The Cretaceous period featured a prolonged greenhouse climate characterized by higher-than-  
24 modern atmospheric CO<sub>2</sub> concentrations and mostly ice-free poles. In such a climate, shallow seas in low  
25 latitudes probably became very hot, especially during the summers. At the same time, life seems to have  
26 thrived there in reef-like ecosystems built by rudists, an extinct group of bivalve molluscs. To test the  
27 seasonal temperature variability in this greenhouse period, and whether temperature extremes exceed  
28 the maximum tolerable temperatures of modern marine molluscs, we discuss a detailed  
29 sclerochronological (incrementally sampled) dataset of seasonal scale variability in shell chemistry from  
30 fossil rudist (*Torreites sanchezi* and *Vaccinites vesiculosus*) and oyster (*Oscillopsa figari*) shells from the  
31 late Campanian (75-million-year-old) low latitude (3°S paleolatitude) Saiwan site in present-day Oman. We  
32 combine trace element data and microscopy to screen fossil shells for diagenesis, before sampling well-  
33 preserved sections of a *Torreites sanchezi* rudist specimen for clumped isotope analysis. Based on this  
34 specimen alone, we identify a strong seasonal variability in temperature of 19.2 ± 3.8°C to 44.2 ± 4.0°C in  
35 the seawater at the Saiwan site. The oxygen isotopic composition of the seawater (δ<sup>18</sup>O<sub>sw</sub>) varied from -  
36 4.62 ± 0.86 ‰ VSMOW in winter to +0.86 ± 1.6 ‰ VSMOW in summer.

37 We use this information in combination with age modelling to infer temperature seasonality from  
38 incrementally sampled oxygen isotope profiles sourced from the literature, sampling multiple shells and  
39 species in the assemblage. We find that, on average, the Saiwan seawater experienced strong seasonal

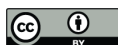

40 fluctuations in monthly temperature ( $18.7 \pm 3.8$  to  $42.6 \pm 4.0$  °C seasonal range) and water isotopic  
41 composition ( $-4.33 \pm 0.86$  to  $0.59 \pm 1.03$  ‰VSMOW). The latter would strongly bias the interpretation of  
42 stable oxygen isotopes in shell carbonate without independent control on either temperature or seawater  
43 composition.

44 Combining our seasonal temperature estimates with shell chronologies based on seasonal cyclicity in  
45 stable isotope records and daily variability in trace element data, we show that *T. sanchezi* rudists record  
46 temperatures during the hottest periods of the year as well as during the winters, which were  
47 characterized by cooler temperatures and enhanced influx of freshwater. Both *O. figari* and *V. vesiculosus*  
48 plausibly stopped growing during these seasonal extremes. This study aims to demonstrate how high-  
49 resolution geochemical records through fossil mollusc shells can shed light on the variability in past warm  
50 ecosystems and open the discussion about the limits of life in the shallow marine realm during greenhouse  
51 climates. Future work should apply the clumped isotope paleothermometer on incrementally sampled  
52 bio-archives to explore the upper-temperature limits experienced by calcifiers in different environments  
53 throughout geological history.

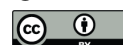

54 **1. Introduction**

55 Ongoing anthropogenic global changes, including greenhouse gas emissions and land use changes, are  
56 projected to increase global mean annual temperatures by multiple degrees with respect to pre-industrial  
57 conditions, while at the same time causing severe biodiversity loss (IPCC, 2023; World Wildlife Fund, 2020).  
58 These crises are intricately linked, but assessing the effect of climate change on biodiversity loss requires  
59 information on the response of biodiversity to climate extremes under various (paleo)climate scenarios.  
60 The geological record provides a rich source of such information in the form of fossil bio-archives that  
61 record climate and environmental change on the scale of days to decades while testifying to biodiversity  
62 by their presence in the rock record (Huyghe et al., 2012; Ivany, 2012; Schmitt et al., 2022). Past ecosystems  
63 thus serve as natural experiments for testing the limits of life during periods of global change or in  
64 exceptionally warm periods (Cermeño et al., 2022; de Winter et al., 2017; Jones et al., 2022).

65 Examples of hot periods that may reveal ecosystems' functioning under high-temperature climate  
66 scenarios include the early Triassic super greenhouse (Sun et al., 2012), the Mid-Cretaceous Climate  
67 Optimum (Jones et al., 2022) or the Eocene hothouse period ( de Winter et al., 2020; Evans et al., 2013).  
68 Milder, yet still warmer than present-day, scenarios of interest include the Late Cretaceous ( de Winter et al.,  
69 2020; O'Hara et al., 2022; Petersen et al., 2016a), the Miocene Climatic Optimum (Batenburg et al.,  
70 2011; Harzhauser et al., 2011) and the Pliocene Warm Period (de Winter et al., 2024; Dowsett et al., 2013;  
71 Wichern et al., 2023). While these periods feature long-term, equilibrated climate states instead of fast,  
72 transient climate change events (like modern anthropogenic warming), they can yield useful insights into  
73 the long-term response of the climate system and biosphere to prolonged radiative forcing (Burke et al.,  
74 2018). For example, some of these past environments, most notably shallow marine ecosystems, are  
75 thought to have reached temperatures exceeding the temperature range of modern equivalent  
76 ecosystems and probably exceeded the maximum temperature tolerance at which modern shallow marine  
77 species can complete their life cycle, which is typically estimated in the order of 38-42°C (Compton et al.,  
78 2007; de Winter et al., 2020; Huang et al., 2017; Jones et al., 2022). Conditions that exceed this threshold  
79 (>38°C) are considered high-temperature conditions for shallow marine calcifiers to live in.

80 A striking conundrum arises in the Late Cretaceous Tethys Ocean margins, which were inhabited by large  
81 rudist bivalves biostromes (Skelton, 2018) despite apparently high water temperatures. The atmospheric  
82 CO<sub>2</sub> concentrations during the Campanian (83.6 – 72.1 Ma (Gradstein et al., 2020)) were ~600 ppmV  
83 (roughly 2x pre-industrial concentrations (Wang et al., 2014)), resulting in low- to mid-latitude mean  
84 annual sea surface temperatures (SST) of 20-25°C (O'Brien et al., 2017), roughly 5-10°C warmer than the  
85 current global mean annual temperature. In low-latitude Tethyan margins, mean annual temperatures  
86 likely exceeded 30°C (Steuber et al., 2005), with summer temperatures estimated above 40°C in some  
87 localities (de Winter et al., 2017, 2020; Steuber, 1999). A big caveat of these estimates is that they rely on  
88 the temperature dependence of stable oxygen isotope analyses and are contingent on assumptions of  
89 (seasonally) constant stable oxygen isotope composition of Tethyan seawater, which is known to have  
90 fluctuated over time (Price et al., 2020; Walliser and Schöne, 2020). If correct, such temperatures exceed  
91 the temperature threshold of 38°C mentioned above and are at or above the lethal thermal limits for  
92 modern marine invertebrates (typically 42-50°C; (Clarke, 2014; Compton et al., 2007)). These  
93 temperatures approach the thermal threshold above which critical macromolecules such as ATP, proteins,  
94 and enzymes used by non-extremophile organisms denature (>50°C) (Clarke, 2014; Tehei et al., 2005; Tehei  
95 and Zaccai, 2007), hampering key metabolic functions. Yet, despite these apparent temperature extremes,  
96 abundant and diverse fossil shallow marine ecosystems suggest that rudists thrived in these environments

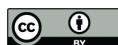

97 (Gili and Götz, 2018; Ross and Skelton, 1993). This raises the question of whether these paleotemperature  
98 reconstructions are accurate, and if so, whether these ancient molluscs were somehow adapted to grow  
99 their shells at these extreme temperatures.

100 In an attempt to resolve this thermal tolerance conundrum, we investigate the growth and chemical  
101 composition of two species of rudist bivalve (*Torreites sanchezi* and *Vaccinites vesiculosis*) and one oyster  
102 species (*Oscillopsa figari*) from the low-latitude Tethyan site in the Saiwan area in east-central Oman  
103 (Kennedy et al., 2000; Schumann, 1995). Our analysis combines new sclerochemical data, including  
104 clumped isotope analyses, with existing stable oxygen isotope datasets from the literature. We aim to test  
105 how the growth of these animals responded to seasonal temperature extremes. To obtain accurate  
106 seasonal temperature reconstructions, which are independent from the Tethyan seawater composition  
107 and *ex vivo* diagenetic alteration, we bring together trace element, stable oxygen isotope, and clumped  
108 isotope information. Using a new clumped isotope dataset, we first demonstrate that *T. sanchezi* records  
109 temperatures in their shells that significantly exceed the threshold at which modern marine molluscs  
110 thrive. We then build on our clumped isotope dataset to test how shell growth was influenced by these  
111 seasonal temperature extremes in this paleoenvironment by combining our results with stable oxygen  
112 isotope records from the literature augmented with new shell chronologies and growth models. We  
113 contrast our seasonality and growth rate reconstructions with data on the thermal ranges of modern  
114 bivalves to compare the tolerance of biostrome-building rudists in the Late Cretaceous with modern  
115 species. Ultimately, this case study will open the discussion of the ability of marine life to adapt to hot  
116 climates and provide lessons for the interaction between climate change and marine biodiversity.

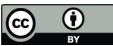

117 **2. Materials and Methods**

118 **2.1 Fossil mollusc specimens**

119 The mollusc shells utilized in this work originate from the Samhan Formation in the Saiwan area of Oman  
120 in the Huqf desert (30°39' N, 57°31' E; see **Figure 1A**). The biostromes in this locality were dated as late  
121 Campanian (~75 Ma) based on ammonite biostratigraphy by (Kennedy et al., 2000). The paleolatitude of  
122 the site at 75 Ma was 3°S according to reconstructions following Paleolatitude.org (van Hinsbergen et al.,  
123 2015) based on the paleomagnetic reference frame by (Vaes et al., 2023). The locality was described by  
124 (Schumann, 1995) as exposing *Vaccinites*-dominated rudist biostromes in which rudist bivalves are  
125 preserved in their life position (see also **Figure 1B-C**). The *V. vesiculosus* and *T. sanchezi* specimens used  
126 and reused in this study originate from Unit IV in profile 1 of (Schumann, 1995), which is equivalent to unit  
127 2 in (Philip and Platel, 1995). The thick-shelled *O. figari* oysters were collected in the marly layer just above  
128 the biostrome (see also **Figure 1B-C** and de Winter et al. (2017)).

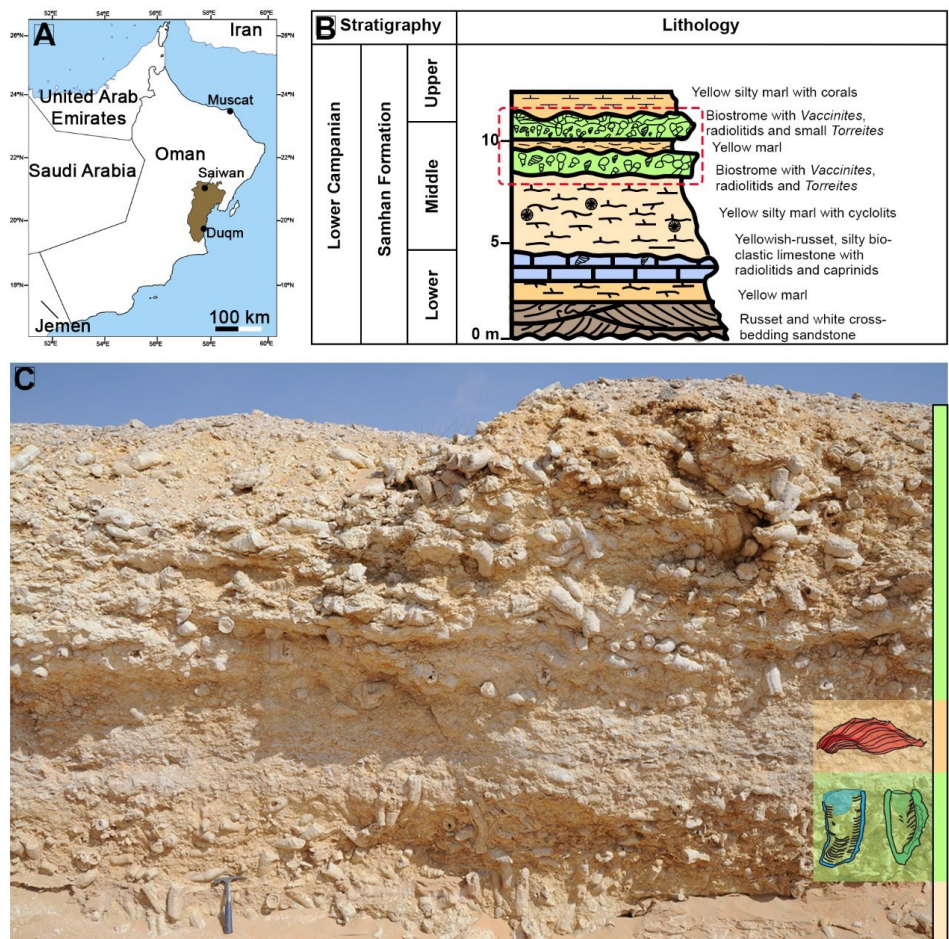

129  
130 **Figure 1:** Showing (A) A map of the geographical location of the Late Campanian Samhan formation in the  
131 Saiwan area in the central part of the Sultanate of Oman. (B) Lithostratigraphic column showing the



132 stratigraphic context of the characteristic members of the Samhan Formation. The red dashed box  
133 indicates the stratigraphic location of the outcrop pictured in (C). (C) Outcrop showing the two *Vaccinites*-  
134 dominated biostromes, the lower of which contained the *T. sanchezi* and *V. vesiculosus* specimens  
135 investigated in this study (indicated by the schematic images of the species). The *O. figari* specimen was  
136 collected in the marly layer just above the biostrome containing the other specimens (indicated by the  
137 schematic image), between the two green units in (B). Panel (B) was modified after (Philip and Platel,  
138 1995).

139 All specimens described in this study were sampled in cross sections through the axis of maximum growth  
140 using a combination of hand drilling and computer-assisted microdrilling using slow-rotating tungsten  
141 carbide dental drills. Table 1 gives an overview of the data used in this study, its temporal resolution and  
142 the source of datasets in cases where they have been reused from the literature. *V. vesiculosus* specimen  
143 “B6”, *T. sanchezi* specimen “B10” and *O. figari* specimen “B11” were described in (de Winter et al., 2017)  
144 and stable isotope ( $\delta^{18}\text{O}$  and  $\delta^{13}\text{C}$ ) and trace element (Mg, Sr, Ca, Mn, Fe) data presented in that study are  
145 used here. Specimen B10 was also subject of a study by (de Winter et al., 2020), in which more detailed,  
146 daily scale trace element measurements (Mg/Ca, Sr/Ca, Mg/Li and Sr/Li) were presented and discussed.  
147 Stable isotope ( $\delta^{18}\text{O}$  and  $\delta^{13}\text{C}$ ) data from *T. sanchezi* specimens “H576”, “H579” and “H585” was previously  
148 reported in (Steuber, 1999). Of these, specimen H579 was sampled in 5 parallel sections (“H579A-E”).

149 For this study, we obtained newly measured stable ( $\delta^{18}\text{O}$  and  $\delta^{13}\text{C}$ ) and clumped ( $\Delta_{47}$ ) isotope analyses on  
150 one additional *T. sanchezi* specimen, called “HU-027”. This specimen was incrementally sampled ( $n = 135$ )  
151 at 50  $\mu\text{m}$  resolution for  $\delta^{18}\text{O}$  and  $\delta^{13}\text{C}$  in a cross-section in the internal pillar of the rudist shell. A total of  
152 96 clumped isotope measurements were carried out on incremental samples from two locations  
153 corresponding to the maximum and minimum  $\delta^{18}\text{O}$  and  $\delta^{13}\text{C}$  values in the above-mentioned profile  
154 (samples R\_1 – R\_11) as well as larger bulk samples in two areas on the same cross-section (samples RB\_1  
155 and RB\_2; Figure 2A). Sample RB\_2 was obtained from a different pillar in the same cross-section, whose  
156 timing of growth can be linked to the adjacent pillar by following the isochronous growth lines visible in  
157 the cross section (Figure 2B). The timing of deposition of the shell calcite sampled in RB\_2 partly overlaps  
158 with incremental samples R\_1 – R\_4, but this sample also contains a significant portion of shell material  
159 deposited earlier in the ontogeny.



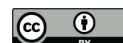

160 **Table 1:** Overview of data used in this study and their sources

| Specimen                     | Species               | Proxy                 | # data points                       | Resolution  | Source                                 |
|------------------------------|-----------------------|-----------------------|-------------------------------------|-------------|----------------------------------------|
| B6                           | <i>V. vesiculosus</i> | $\delta^{18}\text{O}$ | 306                                 | ~2 weeks    | (de Winter et al., 2017)               |
|                              |                       | $\delta^{13}\text{C}$ | 306                                 | ~2 weeks    | (de Winter et al., 2017)               |
|                              |                       | Mg/Ca                 | 735                                 | ~1 week     | (de Winter et al., 2017)               |
|                              |                       | Sr/Ca                 | 735                                 | ~1 week     | (de Winter et al., 2017)               |
|                              |                       | Mn                    | 735                                 | ~1 week     | (de Winter et al., 2017)               |
|                              |                       | Fe                    | 735                                 | ~1 week     | (de Winter et al., 2017)               |
| B10                          | <i>T. sanchezi</i>    | $\delta^{18}\text{O}$ | 310                                 | ~2 weeks    | (de Winter et al., 2017, 2020)         |
|                              |                       | $\delta^{13}\text{C}$ | 310                                 | ~2 weeks    | (de Winter et al., 2017, 2020)         |
|                              |                       | Mg/Ca                 | 12443                               | ~0.5h       | (de Winter et al., 2020)               |
|                              |                       | Sr/Ca                 | 12535                               | ~0.5h       | (de Winter et al., 2020)               |
|                              |                       | Mg/Li                 | 12167                               | ~0.5h       | (de Winter et al., 2020)               |
|                              |                       | Sr/Li                 | 12322                               | ~0.5h       | (de Winter et al., 2020)               |
|                              |                       | Mg/Ca                 | 4353                                | 1-5h        | (de Winter et al., 2017)               |
|                              |                       | Sr/Ca                 | 4361                                | 1-5h        | (de Winter et al., 2017)               |
|                              |                       | Mn                    | 4043                                | 1-5h        | (de Winter et al., 2017)               |
|                              |                       | Fe                    | 3972                                | 1-5h        | (de Winter et al., 2017)               |
| H576                         | <i>T. sanchezi</i>    | $\delta^{18}\text{O}$ | 98                                  | ~3 weeks    | (Steuber, 1999)                        |
|                              |                       | $\delta^{13}\text{C}$ | 98                                  | ~3 weeks    | (Steuber, 1999)                        |
| H579<br>(5 profiles:<br>A-E) | <i>T. sanchezi</i>    | $\delta^{18}\text{O}$ | 288<br>(116 + 46 +<br>47 + 35 + 44) | ~3 weeks    | (Steuber, 1999)                        |
|                              |                       | $\delta^{13}\text{C}$ | 288<br>(116 + 46 +<br>47 + 35 + 44) | ~3 weeks    | (Steuber, 1999)                        |
| H585                         | <i>T. sanchezi</i>    | $\delta^{18}\text{O}$ | 132                                 | ~1 month    | (Steuber, 1999)                        |
|                              |                       | $\delta^{13}\text{C}$ | 132                                 | ~1 month    | (Steuber, 1999)                        |
| HU-027                       | <i>T. sanchezi</i>    | $\delta^{18}\text{O}$ | 231                                 | 1-2 days    | This study (BSc thesis N. al-Fudhaili) |
|                              |                       | $\delta^{13}\text{C}$ | 231                                 | 1-2 days    | This study (BSc thesis N. al-Fudhaili) |
|                              |                       | $\Delta_{47}$         | 86                                  | Seasonal    | This study                             |
|                              |                       | Si & Ca               | map                                 | Spatial map | This study                             |
| B11                          | <i>O. figari</i>      | $\delta^{18}\text{O}$ | 90                                  | ~3 weeks    | (de Winter et al., 2017)               |
|                              |                       | $\delta^{13}\text{C}$ | 90                                  | ~3 weeks    | (de Winter et al., 2017)               |
|                              |                       | Mg/Ca                 | 402                                 | ~3-7 days   | (de Winter et al., 2017)               |
|                              |                       | Sr/Ca                 | 402                                 | ~3-7 days   | (de Winter et al., 2017)               |
|                              |                       | Mn                    | 402                                 | ~3-7 days   | (de Winter et al., 2017)               |
|                              |                       | Fe                    | 367                                 | ~3-7 days   | (de Winter et al., 2017)               |

161 Specimens **H576**, **H579** and **H585** were subject to detailed diagenetic screening in (Steuber, 1999) and the  
162 preservation of specimens **B6**, **B10** and **B11** was tested in (de Winter et al., 2017, 2020; de Winter and  
163 Claeys, 2016). These previous studies concluded, based on a combination of scanning electron microscopy,  
164 cathodoluminescence microscopy and trace element analysis, that there was no detectible  
165 recrystallization in the areas of the shells sampled for geochemical analysis and that the low-magnesium

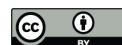

166 calcite outer shell layer of these rudists preserves the original shell composition deposited during the  
167 lifetime of the animal. For the purpose of this study, additional screening based on high-resolution trace  
168 element analyses (Mg/Ca, Sr/Ca, Mn and Fe) will be discussed for specimens **B6**, **B10** and **B11**, one  
169 specimen for each of the three studied species (see **sections 3.2** and **4.1**). The newly sampled specimen  
170 **HU-027** was subject to detailed microscopic scrutiny using a combination of reflected light, cross-polarized  
171 light, scanning electron microscopy and energy dispersive X-ray spectroscopy (EDS) and micro-Raman  
172 spectroscopy to characterize original shell texture preservation and detect diagenetic alteration (**Figure**  
173 **2C-F**).

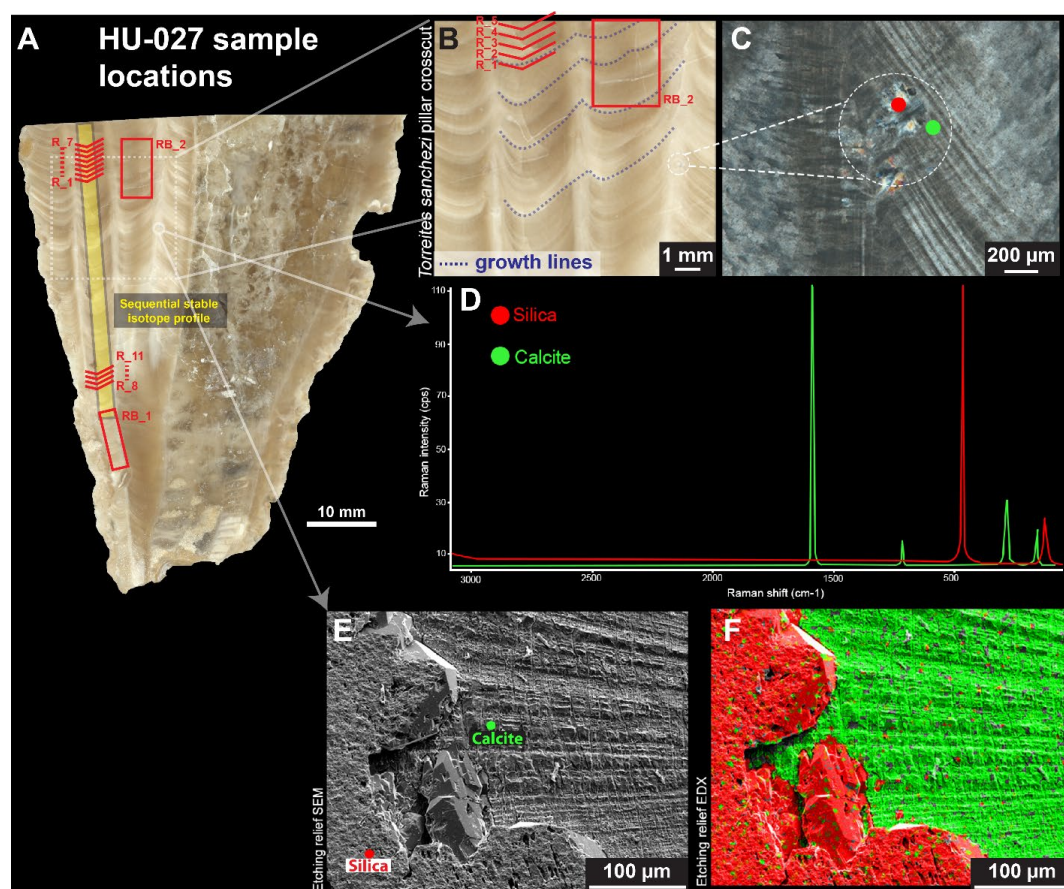

174  
175 **Figure 2:** A) High-resolution colour scan of a cross-section through *T. sanchezi* specimen **HU-027** with the  
176 location of samples for  $\delta^{18}\text{O}$ ,  $\delta^{13}\text{C}$  (yellow rectangle) and clumped isotope analysis (in red). B) Zoomed-in  
177 insert showing fine lamination in columns through **HU-027**, the location of samples **RB\_2** and **R\_1 - R\_5**,  
178 and examples of isochronous growth lines (dashed lines) that link the timing of growth between pillars in  
179 the cross section. C) Cross-polarized light image of the edge of a shell column showing locations for  
180 characterizing diagenetic (silicified) and pristine areas in the shell. D) Raman spectra of pristine calcite  
181 (green) and silicified (red) areas in the shell of **HU-027**. E) Scanning Electron Microscopy fore scatter image  
182 of the area of interest highlighted in B, showing original calcite shell structures (right) and silicified areas





183 of the shell (left). **F**) Energy-dispersive X-ray spectroscopy (EDS) image of the same area shown in **E** showing  
184 the silicon (red) and calcium (green) composition on a micrometre scale.

## 185 2.2 Chemical data

### 186 2.2.1 X-ray fluorescence

187 To test the preservation of shells of the specimens **B6**, **B10** and **B11**, trace element concentrations were  
188 analysed *in situ* using a Bruker M4 Tornado (Bruker nano GmbH) micro-X-ray fluorescence ( $\mu$ XRF) scanner  
189 (see de Winter and Claeys (2016)). The M4 is equipped with a Rh-anode X-ray source, which was operated  
190 at maximum energy settings (50 kV, 600  $\mu$ A) without an X-ray filter, and X-rays were focused on a 25  $\mu$ m  
191 circular spot (calibrated for Mo- $\alpha$  radiation) on the flat sample surface. Fluorescent X-rays were detected  
192 using two silicon drift detectors for maximum count rates.

193 Cross sections of the entire specimens were first mapped to determine the best preserved sampling  
194 localities based on Mn and Fe concentrations (see de Winter et al. (2017)). This  $\mu$ XRF mapping was carried  
195 out by moving the X-ray beam along the sample surface in a raster pattern while continuously collecting  
196 XRF spectra. Since this mapping mode allows to only collect fluorescent X-rays for  $\sim$ 1 millisecond for each  
197 25  $\mu$ m-wide pixel, XRF spectra of individual pixels cannot be quantified. Instead, maps were quantified as  
198 a whole by integrating the area under XRF peaks for all pixels, producing false-colour images of semi-  
199 quantitative trace element abundance across the entire specimen (see de Winter et al. (2017)).

200 Quantitative XRF profiles were gathered in growth direction on **cross** sections through the shells by  
201 analysing point-by-point line scans (see Vansteenberge et al. (2020)). This point-by-point analysis allows  
202 the X-ray beam to dwell on a single spot for 60 seconds, allowing the detectors to gather enough XRF  
203 counts for a quantifiable XRF spectrum (de Winter et al., 2017). XRF data were quantified through a  
204 combination of peak deconvolution and fundamental parameter quantification in the Bruker Esprit  
205 software (Bruker nano GmbH) calibrated using the matrix-matched carbonate reference material BAS-  
206 CRM393 (Bureau of Analyzed Samples, Middlesbrough, UK). Quantified trace element concentrations  
207 were subsequently calibrated based on a set of 10 matrix-matched carbonate reference materials (see  
208 (Vellekoop et al., 2022) to obtain reproducible trace element concentrations. The XRF maps and line scans  
209 were used to demonstrate the preservation of the original calcium carbonate in specimens **B6**, **B10** and  
210 **B11**. Full XRF datasets for all analysed specimens are provided in **Supplement S1** in the accompanying  
211 Zenodo repository (<https://doi.org/10.5281/zenodo.12567712>).

### 212 2.2.2 Laser Ablation Inductively Coupled Plasma Mass Spectrometry

213 High-resolution Laser Ablation-Inductively Coupled Plasma Mass Spectrometry (LA-ICP-MS) profiles of Li,  
214 Mg, Sr, Ca, Mn and Fe concentrations through *T. sanchezi* specimen **B10** were reused from (de Winter et  
215 al., 2020). These profiles were measured using an Analyte G2 ArF\*excimer-based laser ablation system  
216 (Teledyne Photon Machines, Bozeman, USA) coupled to an Agilent 7900 (for LA-ICP-MS; Agilent, Santa  
217 Clara, USA) quadrupole-based ICP-MS unit. The laser was focused on a round 10  $\mu$ m spot on the sample  
218 surface and translated continuously in line scanning mode to gather sub-daily resolved data along the  
219 entire shell height. LA-ICP-MS results were calibrated using repeated measurements of United States  
220 Geological Survey (USGS) BCR-2G, USGS BHVO-2G, USGS GSD-1G, and USGS-GSE-1G and National Institute  
221 of Standards and Technology SRM610 and National Institute of Standards and Technology SRM612



certified natural and synthetic glass reference materials. All LA-ICP-MS concentration data are provided in **Supplement S1** in the Zenodo repository.

### 2.2.3 Isotope Ratio Mass Spectrometry

Stable carbon ( $\delta^{13}\text{C}$ ) and oxygen ( $\delta^{18}\text{O}$ ) values from specimens **B6**, **B10**, **B11**, **H576**, **H579** and **H585** were reused from (de Winter et al., 2017) and (Steuber, 1999). This dataset was augmented by new sequentially sampled  $\delta^{13}\text{C}$  and  $\delta^{18}\text{O}$  measurements along the central pillar through specimen **HU-027** (see **Figure 2**). All  $\delta^{13}\text{C}$  and  $\delta^{18}\text{O}$  data were obtained by analysing carbonate powders sampled in cross sections through the specimens using an Isotope Ratio Mass Spectrometer (IRMS) coupled to a carbonate preparation device. The stable isotope analyses for the incremental samples in **HU-027**, specifically, were analysed by a Thermo DELTA V+ IRMS coupled to a Gasbench carbonate preparation device. During sampling, care was taken to avoid areas in the shell characterized by elevated Mn and Fe concentrations (see trace element results in **section 3.2** and (de Winter et al., 2017)) and microscopic signs of diagenetic alteration (see **Figure 2**). Standard deviations of uncertainty on  $\delta^{13}\text{C}$  and  $\delta^{18}\text{O}$  values produced using this technique are 0.05 ‰ and 0.10 ‰, respectively. An overview of the  $\delta^{13}\text{C}$  and  $\delta^{18}\text{O}$  records through all IRMS profiles is provided in **Supplement S2** in the Zenodo repository.

Representative samples from two parallel central pillars of specimen **HU-027** were sampled for clumped isotope analysis (see **Figure 2**). During sampling, care was taken to avoid the diagenetically altered sections of the shell (**Figure 2C-F**). Two areas in **HU-027** were drilled for bulk clumped isotope analysis (“RB\_1” and “RB\_2”; **Figure 2A**; see **section 2.1**), after which samples were drilled from transects in growth direction along one of the pillars exposed in the shell (**Figure 2A**). A total of 94 small (70–95  $\mu\text{g}$ ) aliquots of calcite powder were reacted with anhydrous (103%) phosphoric acid in a Kiel IV carbonate device. The resulting  $\text{CO}_2$  was cryogenically purified and cleaned using a PoraPak Q trap kept at  $-40^\circ\text{C}$  (Petersen et al., 2016b) before being led into a MAT253 or MAT253 PLUS IRMS via a Dual Inlet system. Intensities on masses 44–49 of the  $\text{CO}_2$  samples were measured using the Long Integration Dual Inlet mode (Müller et al., 2017) with 400 s integration time against a clean  $\text{CO}_2$  working gas ( $\delta^{13}\text{C} = -2.82$  ‰;  $\delta^{18}\text{O} = -4.67$  ‰), corrected for the pressure baseline (He et al., 2012). Clumped isotope values ( $\Delta_{47}$ ) were brought into the Intercarb Carbon Dioxide Equilibrium Scale (I-CDES; Bernasconi et al., 2021) using the three ETH standards (ETH-1, ETH-2 and ETH-3) and their accepted values (Bernasconi et al., 2018). Throughout this procedure, samples were corrected with standards whose signal intensities on the mass 44 cup deviated from the intensities of the samples by less than 1 V to prevent any intensity-based offset in the clumped isotope values to bias the result. For samples for which less than 5 intensity-matched standards were available for this correction, the  $\Delta_{47}$  value was not considered in the rest of the analysis. The complete analytical system was monitored regarding performance with two independent standards (IAEA-C2,  $N = 49$ , and Merck,  $N = 48$ ), which were treated as samples throughout the measurement procedure. The standard deviations of  $\Delta_{47}$  values of these check standards were 0.053 ‰ for IAEA-C2 and 0.039 ‰ for Merck. The reproducibility standard deviations of  $\delta^{13}\text{C}$  and  $\delta^{18}\text{O}$  for IAEA-C2 were 0.05 ‰ and 0.09 ‰ respectively and for Merck the reproducibility standard deviations were 0.09 ‰ and 0.13 ‰ for  $\delta^{13}\text{C}$  and  $\delta^{18}\text{O}$  respectively. Results of clumped and associated stable isotope data are reported in **Supplement S2** in the Zenodo repository. A summary of the  $\delta^{13}\text{C}$ ,  $\delta^{18}\text{O}$  and  $\Delta_{47}$  values organized by the four regions of **HU-027** that were sampled (see **Figure 2**) is presented in **Table 2**.



**Table 2:** Statistics of carbon, oxygen and clumped isotope results organized per sampled region in specimen **HU-027**.

| Sampled region:    | R_01-R_07                   |                                   |                                   | R_08-R_11                   |                                   |                                   | RB_1                        |                                   |                                   | RB_2                        |                                   |                                   |
|--------------------|-----------------------------|-----------------------------------|-----------------------------------|-----------------------------|-----------------------------------|-----------------------------------|-----------------------------|-----------------------------------|-----------------------------------|-----------------------------|-----------------------------------|-----------------------------------|
| Proxy:             | $\Delta_{47}$<br>(‰ I-CDES) | $\delta^{18}\text{O}$<br>(‰ VPDB) | $\delta^{13}\text{C}$<br>(‰ VPDB) | $\Delta_{47}$<br>(‰ I-CDES) | $\delta^{18}\text{O}$<br>(‰ VPDB) | $\delta^{13}\text{C}$<br>(‰ VPDB) | $\Delta_{47}$<br>(‰ I-CDES) | $\delta^{18}\text{O}$<br>(‰ VPDB) | $\delta^{13}\text{C}$<br>(‰ VPDB) | $\Delta_{47}$<br>(‰ I-CDES) | $\delta^{18}\text{O}$<br>(‰ VPDB) | $\delta^{13}\text{C}$<br>(‰ VPDB) |
| N                  | 29                          | 35                                | 35                                | 16                          | 20                                | 20                                | 27                          | 27                                | 27                                | 14                          | 14                                | 14                                |
| Median value       | 0.544                       | -6.12                             | 0.66                              | 0.560                       | -4.71                             | 2.02                              | 0.608                       | -5.81                             | 1.37                              | 0.569                       | -5.02                             | 1.67                              |
| Mean value         | 0.543                       | -6.13                             | 0.73                              | 0.560                       | -4.71                             | 2.02                              | 0.614                       | -5.80                             | 1.37                              | 0.577                       | -5.03                             | 1.67                              |
| Standard deviation | 0.032                       | 0.26                              | 0.35                              | 0.035                       | 0.20                              | 0.12                              | 0.037                       | 0.06                              | 0.04                              | 0.027                       | 0.08                              | 0.02                              |
| Minimum            | 0.460                       | -6.75                             | -0.14                             | 0.504                       | -5.22                             | 1.76                              | 0.557                       | -5.93                             | 1.30                              | 0.540                       | -5.28                             | 1.60                              |
| Maximum            | 0.589                       | -5.67                             | 1.43                              | 0.619                       | -4.42                             | 2.28                              | 0.697                       | -5.70                             | 1.46                              | 0.621                       | -4.97                             | 1.70                              |

### 2.3 Modern bivalve occurrence and climate

To contrast the paleoclimate reconstructions from the above-mentioned multi-proxy dataset, we extracted data on the occurrences of bivalves in modern oceans from the Ocean Biodiversity Information System database (OBIS, 2020). We accessed the OBIS database through the “occurrences” function of the “robis” package (Provoost et al., 2022) and processed the occurrences in the open-source computational software package R (R Core Team, 2023). A total of 2199523 occurrences of taxa in the class of Bivalvia were extracted from the database, and their localities were categorized in bins of 2° by 2° based on their latitude and longitude.

Modern seasonal SST ranges across the world oceans were extracted from the Extended Reconstructed Sea Surface Temperature (ERSST) dataset from the National Oceanic and Atmospheric Administration (NOAA; (Huang et al., 2017)). We extracted monthly data from the years 1981 until 2010 on a 2° by 2° latitude and longitude grid from the ERSST dataset. We extracted the warmest and coldest monthly temperatures from the grid cells that contained reported occurrences of bivalves in the OBIS dataset. This resulted in a distribution of the warmest and coldest monthly temperatures across the living environment of modern bivalves.

### 2.4 Data processing

Our clumped isotope dataset on specimen **HU-027** yielded information about the seasonal spread in temperature and the water oxygen isotopic value ( $\delta^{18}\text{O}_w$ ) experienced by this specimen. We reconstructed these parameters from the  $\Delta_{47}$  and  $\delta^{18}\text{O}_c$  values of the shell carbonate following the clumped isotope-temperature relationship by (Daëron and Vermeesch, 2023) and the calcite  $\delta^{18}\text{O}_c$ - $\delta^{18}\text{O}_w$ -temperature relationship by (Kim and O’Neil, 1997). This dataset allowed us to characterize seasonal variability in climate in the Saiwan paleoenvironment. However, since the relatively short  $\delta^{18}\text{O}$  profile from **HU-027** did not allow age modelling and the clumped isotope dataset only sampled one specimen, we augmented the dataset from **HU-027** with  $\delta^{18}\text{O}$ ,  $\delta^{13}\text{C}$  and trace element data from other specimens (see section 2.2.3) in the same assemblage to study the relationship between temperature and growth rate in Saiwan. To achieve this, we carried out subsequent data processing steps outlined below.

To reconstruct shell growth rates of the molluscs and water temperatures in the Saiwan environment from chemical data measured in the shells, we carried out the following data processing steps (see also the flowchart in **Figure 3**):



- 294 1. We used concentrations of Mn and Fe and Mg/Ca and Sr/Ca ratios to screen for diagenetic  
295 recrystallization of parts of the shells, and remove chemical data from suspicious shell sections for  
296 further analysis.  
297 2. We applied the ShellChron age model (de Winter, 2021) to produce internal shell chronologies  
298 based on seasonal cyclicity in  $\delta^{18}\text{O}$  and  $\delta^{13}\text{C}$  values through each shell profile.  
299 3. We applied the Daydacna age model (Arndt et al., 2023) to produce internal shell chronologies  
300 based on subdaily-scale trace element variability in specimen **B10** to verify the result of the  
301 ShellChron algorithm.  
302 4. We use a combination of oxygen isotope and clumped isotope data, grouped per location in  
303 specimen **HU-027** to reconstruct seasonal changes in temperature and  $\delta^{18}\text{O}_w$  in the Saiwan  
304 environment, and how they relate to the oxygen isotope variability in the shells.  
305 5. We use the information about  $\delta^{18}\text{O}_w$  variability in the environment from clumped isotope data in  
306 **HU-027** to reconstruct seasonal temperature variability in the Saiwan ecosystem based on all  $\delta^{18}\text{O}$   
307 profiles.  
308 6. We combine seasonal-scale information about shell growth rates and temperatures to determine  
309 the maximum temperature at which the mollusc species mineralized their shell and to quantify  
310 effect of temperature on shell growth rates in Saiwan.

311 Details on the diagenetic screening are discussed in **sections 3.2** and **4.1**. Assumptions and details  
312 regarding all data processing steps are explained below.

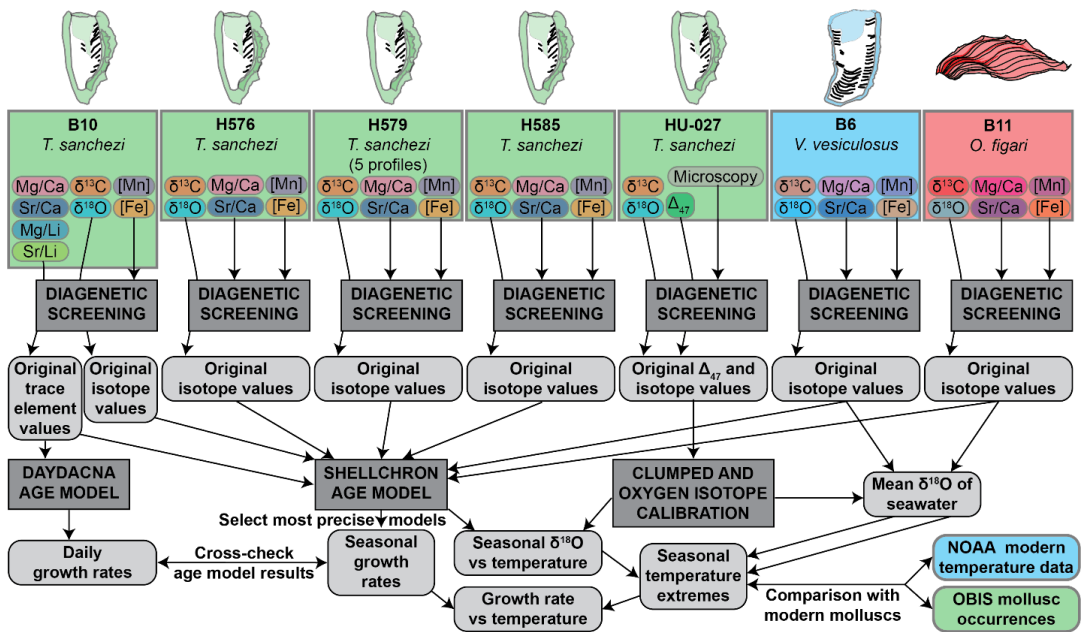

313

314 **Figure 3:** Flowchart of data processing steps carried out for this study.

315 2.4.1 Seasonal scale age models using ShellChron

316 Internal age models were created for all  $\delta^{18}\text{O}$  and  $\delta^{13}\text{C}$  profiles in all specimens except for **HU-027**, for  
317 which the  $\delta^{18}\text{O}$  and  $\delta^{13}\text{C}$  profile was too short to meet the criteria for applying the algorithm (see below),

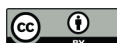

as well as the Mg/Ca and Sr/Ca profiles in *T. sanchezi* specimen **B10** based on the growth rate modelling routine ShellChron (de Winter, 2021). ShellChron approximates the shape of the proxy curve from combinations of sinusoidal proxy and growth rate curves. The routine was adapted after the work by (Judd et al., 2017) to function in a sliding window algorithm to provide one age-distance model for the entire profile, preventing breaks and time jumps between growth years. ShellChron can approximate the internal chronology of any proxy-distance record using the following assumptions:

1. The proxy has a (quasi)periodic behaviour over the year. In other words: The proxy exhibits one maximum and one minimum per annual cycle.
2. The mineralization (or growth) rate of the archive over a year can be approximated by a (skewed) sinusoid, with one annual maximum and one minimum (which can be zero).
3. The proxy record contains at least 2 full annual cycles to allow for sufficient overlap between moving windows.

ShellChron estimates the uncertainties of age estimates per datapoint by comparing the results of overlapping windows on the proxy record during the sliding window approach which is applied in the model. Since the proxy-depth record in each window in the ShellChron model is estimated separately using a new combination of proxy and growth rate sinusoid, subsequent age estimates for the same distance value can have different, independent outcomes with respect to relative age estimate. In addition, ShellChron propagates the uncertainty on the distances and proxy values (if provided) using a Monte Carlo approach, resulting in a realistic estimate of the uncertainty on the age determination (de Winter, 2021). For each datapoint, the model thus produces a distribution of ages, from which an uncertainty on the relative age of each datapoint is obtained. These can in turn be averaged to gauge the overall precision of the model outcome. In addition, wide age distributions for the same datapoint are indicative of misidentifications of annual cycles in the  $\delta^{18}\text{O}$  profile, which cause bifurcations in the model outcome, increasing the spread in age outcomes. Therefore, the overall precision of the ShellChron outcome yields information about the certainty of age modelling and can be used as a benchmark for selecting the most reliable age-distance relationship in a shell. The shell height vs age relationships estimated using ShellChron for multiple proxy records ( $\delta^{18}\text{O}$ ,  $\delta^{13}\text{C}$  and trace element ratios, if available) from each specimen except **HU-027**, including their uncertainties, are provided in **Supplement S3** in the Zenodo repository. The age-distance relationships resulting from the most precise age model for each specimen were used to assign a time of the year to each stable isotope and trace element datapoint used in this study.

#### 2.4.2 Sub-seasonal age model using Daydacna

For *T. sanchezi* specimen **B10**, from which subdaily-scale Mg/Ca, Mg/Li, Sr/Ca and Sr/Li data was available (de Winter et al., 2020), we applied the growth modelling routine Daydacna (Arndt et al., 2023) to verify the ShellChron results and enhance the resolution of the age model. Daydacna uses a wavelet transformation to detect daily rhythms in chemical profiles through mollusc shells and applies a user-guided peak identification routine to find age-depth relationships in the shell on a daily scale. We applied the Daydacna routine on subdaily scale Mg/Ca, Mg/Li, Sr/Ca and Sr/Li records one by one through specimen **B10** (see script in **Supplement S4** in the Zenodo repository). We compare the results of Daydacna with the results of ShellChron, which are based on annual cycles in  $\delta^{18}\text{O}$  and  $\delta^{13}\text{C}$  profiles and are therefore independent from the Daydacna results based on daily cycles in trace element ratios.





#### 2.4.3 Monthly binning of isotope data

Stable isotope data from profiles through all specimens were cross-referenced with shell age results from ShellChron and Daydacna. Datapoints for which age modelling did not yield a conclusive age (e.g. stable isotope datapoints from locations in between data in trace element profiles) were dated by linear interpolation between surrounding samples for which dates were available. All chemical data were then binned into monthly time bins based on the age models. Monthly bins were assigned by dividing the year into 12 equal time segments, defining boundaries between months based on the day of the year. These monthly time bins were assigned 30 times for each specimen, shifting the boundaries between the months by 1 modelled day for each new assignment. The optimal monthly assignment was subsequently found by picking the option out of 30 in which the months with the highest and lowest mean  $\delta^{18}\text{O}$  value exhibited the highest difference. This age assignment is assumed to find the highest (least smoothed) seasonal variability in  $\delta^{18}\text{O}$ , while staying true to the sub-annual growth rate variability exhibited by the specimen as modelled by the ShellChron and Daydacna algorithms.

Note that this monthly binning assumes a total of 365 days in a year, while in reality the number of days per year during the Late Cretaceous was higher (de Winter et al., 2020). In addition, it is possible that growth stops occur which prevent the mollusc from recording one or more days during periods of stress (Jones, 1983), even though no clear signs of these were directly observed in our specimens. However, this difference does not influence the monthly binning since 12 equal parts of the year were considered and the number of days per year assumed in the ShellChron and Daydacna models was also set to 365.

#### 2.4.4 Combining clumped isotope and $\delta^{18}\text{O}$ data

To overcome the lack of precise intra-shell age control in **HU-027** and place the clumped isotope results in a seasonal context, we grouped the  $\Delta_{47}$  and carbonate  $\delta^{18}\text{O}$  ( $\delta^{18}\text{O}_c$ ) data from specimen **HU-027** in four bins according to their sampling location (see **Figure 2** and **Table 2**). This resulted in a seasonal spread of  $\Delta_{47}$ ,  $\delta^{18}\text{O}_c$  and  $\delta^{13}\text{C}$  values which allowed us to quantify the relationship between  $\delta^{18}\text{O}_c$  and  $\Delta_{47}$  (and therefore temperature and  $\delta^{18}\text{O}_w$ ) in the Saiwan environment.

To verify whether our choice of sampling locations for clumped isotope analysis in specimen **HU-027** sampled the full seasonal spread in (clumped) isotopic values, we applied a clustering routine to the carbonate  $\delta^{18}\text{O}$  ( $\delta^{18}\text{O}_c$ ) and  $\delta^{13}\text{C}$  values of **HU-027** using K-means and Partitioning Around Medoids (PAM) clustering routines (see **Supplement S5** in the Zenodo repository). The K-means routine groups datapoints in the  $\delta^{18}\text{O}_c$ - $\delta^{13}\text{C}$  space into clusters minimizing the squared Euclidian distance between the points within a cluster using the iterative Hartigan-Wong algorithm coded in the “kmeans” function of the “stats” package in R (Hartigan and Wong, 1979; R Core Team, 2023; “stats package,” 2019). Clustering was repeated on the same dataset using the PAM algorithm (Kaufman and Rousseeuw, 1990) using the “pam” function of the “cluster” package (“cluster package,” 2023; Maechler et al., 2023).

Because of the strong seasonal cycles in productivity, dissolved inorganic carbon composition, freshwater influx and temperature in shallow marine settings, summer and winter seasons are typically recorded through distinct combined  $\delta^{18}\text{O}_c$  and  $\delta^{13}\text{C}$  signatures in mollusc shells (De Winter et al., 2018; McConnaughey and Gillikin, 2008; Surge et al., 2001). By combining the statistical clustering approach on  $\delta^{18}\text{O}_c$  and  $\delta^{13}\text{C}$  data with this knowledge of typical seasonal isotopic signatures, we verified the assignment of summer and winter seasons in the geochemical record of **HU-027** independent from their sampling location. Note that the assignment of bins in our clumped isotope dataset does not rely on this clustering



399 outcome, as the binning was based primarily on location in the shell and only cross-checked with the  
400 statistical clustering.

401 We modelled the relationship between  $\delta^{18}\text{O}_c$ ,  $\delta^{18}\text{O}_w$  and clumped isotope-based temperature in the  
402 Saiwan environment from the data in specimen **HU-027**. To do so, we used the relative timing of the four  
403 clumped isotope clusters (RB\_1 directly preceding R\_8 – R\_11 and RB\_2 preceding and partly overlapping  
404 with R\_1 – R\_7; see **Figure 2**) and the assumption that the warmest and coldest clusters record summer  
405 and winter temperatures, respectively, to determine the order of the clumped isotope clusters throughout  
406 the year. We then simulated the pathways between consecutive clusters in the  $\delta^{18}\text{O}_c$ ,  $\delta^{18}\text{O}_w$  and  
407 temperature through a Monte Carlo simulation, taking into account the uncertainty on these three  
408 parameters within the clusters. We simulated 1000 linear pathways between the clusters consisting of 100  
409 steps while preserving the relationships between  $\delta^{18}\text{O}_c$ ,  $\delta^{18}\text{O}_w$  and temperature, sampling the start and  
410 end points from the uncertainty distributions of the parameters in the clusters.

411 We then estimated  $\delta^{18}\text{O}_w$  values for each stable isotope measurement in our compilation for which no  
412 clumped isotope values were available using this seasonal  $\delta^{18}\text{O}_c$ - $\delta^{18}\text{O}_w$  relationship. Since the cyclical  
413 nature of the seasonal  $\delta^{18}\text{O}_c$ - $\delta^{18}\text{O}_w$  relationship produces non-unique  $\delta^{18}\text{O}_w$  estimates for any given  $\delta^{18}\text{O}_c$   
414 value (see section 3.4), we used the seasonal timing of the  $\delta^{18}\text{O}_c$  datapoints to obtain the most likely  $\delta^{18}\text{O}_w$   
415 outcome:  $\delta^{18}\text{O}_c$  values associated with the warm, high- $\delta^{18}\text{O}_w$  spring/summer season (before the summer  
416  $\delta^{18}\text{O}_c$  minimum) were assigned the highest of the two possible  $\delta^{18}\text{O}_w$  outcomes. Samples associated with  
417 the lower temperature and  $\delta^{18}\text{O}_w$  half of the seasonal cycle (after the summer  $\delta^{18}\text{O}_c$  minimum) were  
418 assigned the lowest of the two possible  $\delta^{18}\text{O}_w$  outcomes. For the specimens of *V. vesiculosus* (**B6**) and *O.*  
419 *figari* (**B11**), which exhibit higher  $\delta^{18}\text{O}_c$  values than the *T. sanchezi* specimens,  $\delta^{18}\text{O}_w$  values were assigned  
420 based on the seasonal timing of the  $\delta^{18}\text{O}_c$  values. Temperatures were calculated for all  $\delta^{18}\text{O}_c$  outcomes in  
421 our compilation based on the  $\delta^{18}\text{O}_c$  measurements and  $\delta^{18}\text{O}_w$  estimates. We produce monthly  
422 temperature and  $\delta^{18}\text{O}_w$  estimates for each specimen by grouping the data obtained from applying the  
423 clumped isotope-derived  $\delta^{18}\text{O}_c$ - $\delta^{18}\text{O}_w$ -temperature relationship on  $\delta^{18}\text{O}_c$  profiles in monthly bins per  
424 specimen.

425 To test the sensitivity of our  $\delta^{18}\text{O}_w$  and temperature estimates to the observation that the  $\delta^{18}\text{O}_w$  varies  
426 seasonally following the **HU-027** clumped isotope outcomes, we also calculated temperatures for all  $\delta^{18}\text{O}_c$   
427 profiles using a constant  $\delta^{18}\text{O}_w$  value equal to the mean  $\delta^{18}\text{O}_w$  value of the three warmer clusters identified  
428 in the clumped isotope dataset from **HU-027** (average:  $-0.25$  ‰ VSMOW), excluding the cluster that has a  
429 low ( $-4.61 \pm 0.86$  ‰ VSMOW)  $\delta^{18}\text{O}_w$  value. We repeated this test assuming the classical (and seasonally  
430 constant)  $\delta^{18}\text{O}_w$  value of  $-1$  ‰ VSMOW, which is often thought to represent fully marine conditions in a  
431 land ice-free climate (Shackleton, 1986). We discuss the impact of the decision not to consider seasonal  
432 variability in  $\delta^{18}\text{O}_w$  values for these specimens in **section 4.3**.



### 3. Results

#### 3.1 Stable isotope results

All specimens show distinct periodic patterns in  $\delta^{18}\text{O}_c$  and  $\delta^{13}\text{C}$  values when plotted in growth direction through the shells (**Figure 4**). Stable oxygen isotope values ( $\delta^{18}\text{O}_c$ ) in the shells vary between  $-7.1$  ‰VPDB and  $-1.5$  ‰VPDB with a mean  $\delta^{18}\text{O}_c$  value of  $-5.1 \pm 0.9$  ‰VPDB ( $1\sigma$ ) for the entire dataset. The lowest mean  $\delta^{18}\text{O}_c$  values are recorded in *T. sanchezi* shells ( $-5.5 \pm 0.6$  ‰VPDB;  $1\sigma$ ), with higher values recorded in *V. vesiculosus* ( $-4.1 \pm 0.6$  ‰VPDB;  $1\sigma$ ) and *O. figari* ( $-3.6 \pm 0.4$  ‰VPDB;  $1\sigma$ ). Similarly, the lowest mean  $\delta^{13}\text{C}$  values are recorded in *T. sanchezi* ( $0.7 \pm 0.9$  ‰VPDB;  $1\sigma$ ), followed by *V. vesiculosus* ( $0.8 \pm 0.4$  ‰VPDB;  $1\sigma$ ) and *O. figari* ( $1.7 \pm 0.6$  ‰VPDB;  $1\sigma$ ).

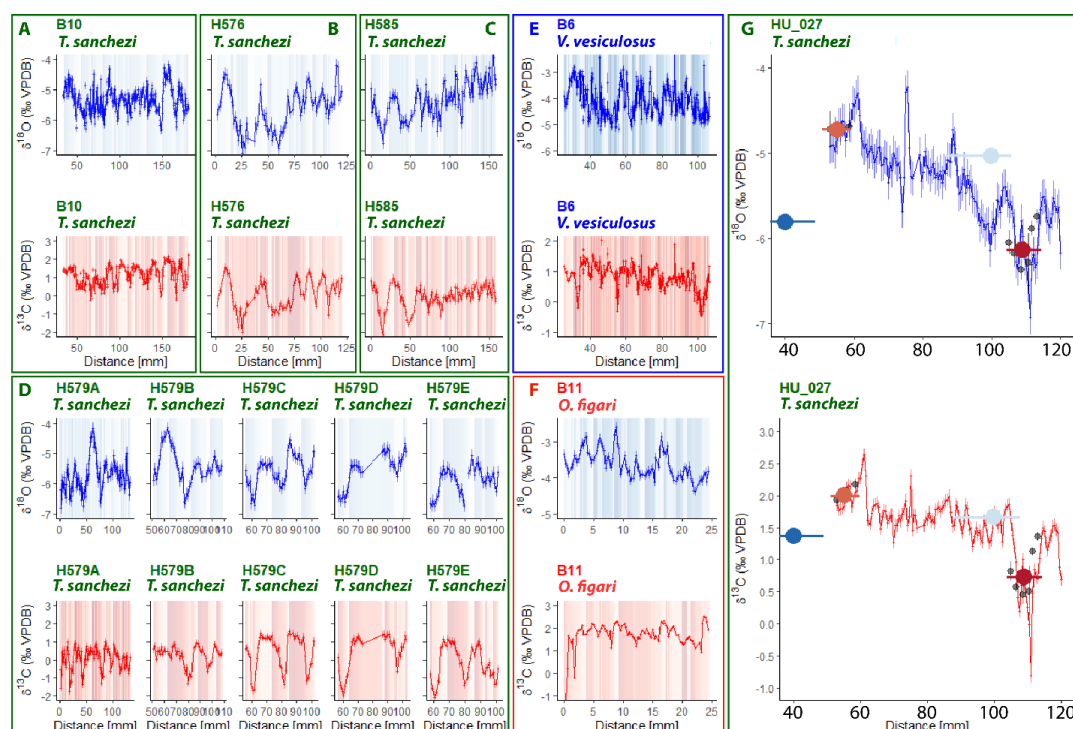

**Figure 4:** Overview of 9 incrementally sampled stable oxygen ( $\delta^{18}\text{O}_c$ ; blue) and carbon isotope ( $\delta^{13}\text{C}$ ; red) profiles through *T. sanchezi* specimens (**A, B, C, D & F**; green frame) and one profile of both  $\delta^{18}\text{O}_c$  and  $\delta^{13}\text{C}$  through *V. vesiculosus* specimen **B6** (**E**; blue frame) and *O. figari* specimen **B11** (**G**; red frame). Vertical axes of *T. sanchezi* profiles in **A-D** are equal, while *V. vesiculosus*, *O. figari* and *T. sanchezi* specimen **HU-027** have different vertical axes. Records in **D** represent parallel profiles through the same specimen (**H579**). The shaded background colours represent time of year based on the ShellChron chronologies constructed using these  $\delta^{18}\text{O}_c$  and  $\delta^{13}\text{C}$  profiles, with darker colour indicating samples assigned to days earlier in the year. Black dots in **G** show  $\delta^{18}\text{O}_c$  and  $\delta^{13}\text{C}$  values associated with clumped isotope measurements in **HU-027** and colored dots and error bars indicate the spread in  $\delta^{18}\text{O}_c$  and  $\delta^{13}\text{C}$  and location of the material used in clumped clusters presented in **Figure 7**.

#### 3.2 Trace element results



Trace element analyses highlight that shells of all three species are generally characterized by low concentrations of Mn and Fe (**Figure 5**). *T. sanchezi* exhibits median Mn concentrations of 38  $\mu\text{g/g}$  (average:  $50 \pm 44 \mu\text{g/g}$ ,  $1\sigma$ ) and median Fe concentrations of 56  $\mu\text{g/g}$  (average:  $77 \pm 116 \mu\text{g/g}$ ,  $1\sigma$ ) with a few isolated locations in the shell with concentrations exceeding 300  $\mu\text{g/g}$  and 1000  $\mu\text{g/g}$  for Mn and Fe, respectively. The carbonate in *V. vesiculosus* has somewhat higher median Mn concentrations of 176  $\mu\text{g/g}$  (average:  $192 \pm 94 \mu\text{g/g}$ ,  $1\sigma$ ) and median Fe concentrations of 125  $\mu\text{g/g}$  (average:  $173 \pm 152 \mu\text{g/g}$ ,  $1\sigma$ ) with some locations showing Mn and Fe concentrations exceeding 500  $\mu\text{g/g}$  and 800  $\mu\text{g/g}$ , respectively. A clear positive trend is observed towards higher Mn and Fe concentrations in *V. vesiculosus* samples (**Fig. 5A**). Finally, *O. figari* has median Mn concentrations of 63  $\mu\text{g/g}$  (average:  $75 \pm 33 \mu\text{g/g}$ ,  $1\sigma$ ) and much lower median Fe concentrations of 4  $\mu\text{g/g}$  (average:  $5.7 \pm 5.8 \mu\text{g/g}$ ,  $1\sigma$ ), with maximum Mn and Fe concentrations of 180  $\mu\text{g/g}$  and 40  $\mu\text{g/g}$ , respectively, in some locations.

Mg/Ca and Sr/Ca ratios are very similar between *T. sanchezi* and *V. vesiculosus*, with mean Mg/Ca ratios of  $11.4 \pm 2.4 \text{ mmol/mol}$  ( $1\sigma$ ) for *T. sanchezi* and  $11.5 \pm 4.8 \text{ mmol/mol}$  ( $1\sigma$ ) for *V. vesiculosus* and mean Sr/Ca ratios of  $1.49 \pm 0.21 \text{ mmol/mol}$  ( $1\sigma$ ) for *T. sanchezi* and  $1.09 \pm 0.45 \text{ mmol/mol}$  ( $1\sigma$ ) for *V. vesiculosus*. A subset of the samples from *V. vesiculosus* exhibit a clear trend towards lower Mg/Ca and Sr/Ca values. *O. figari* exhibits much lower Mg/Ca values ( $1.87 \pm 1.15 \text{ mmol/mol}$ ;  $1\sigma$ ) and Sr/Ca values of  $1.36 \pm 0.18 \text{ mmol/mol}$  ( $1\sigma$ ).

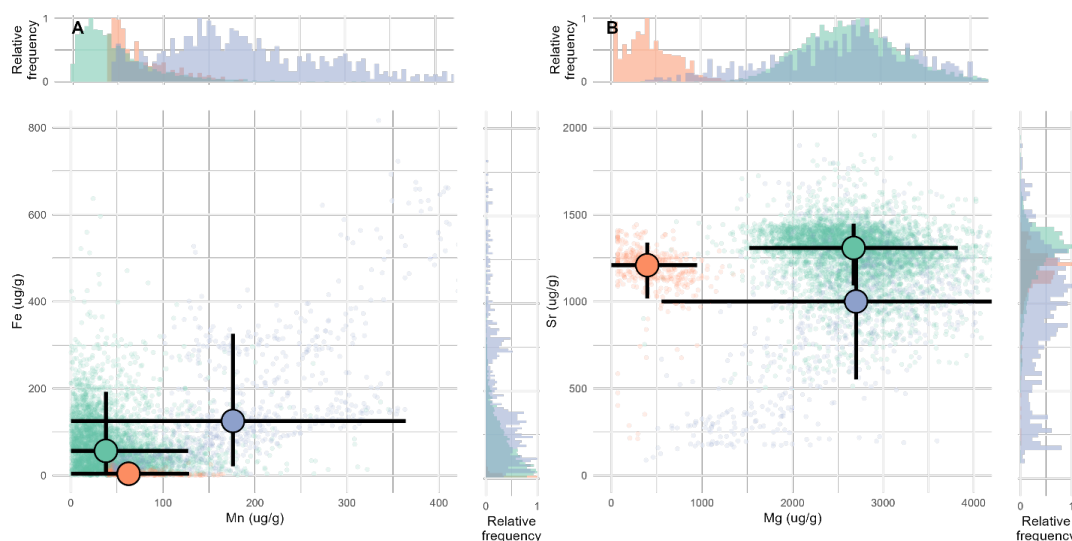

**Figure 5:** Cross plots of manganese vs iron (**A**) and magnesium vs strontium (**B**) concentrations in *T. sanchezi* (green), *V. vesiculosus* (blue) and *O. figari* (red) measured using micro-XRF line scan analysis. Shaded points highlight individual measurements in profiles through the shells while bold black crossed lines highlight median concentration values with 2 standard deviations of the variability per species. Histograms on the edges of the plot show the distribution of concentration values in the dataset per element.

### 3.3 Age model results

Applying ShellChron on Mg/Ca, Sr/Ca (only for specimen **B10**),  $\delta^{18}\text{O}_c$  and  $\delta^{13}\text{C}$  values through all specimens except **HU-037** yielded information about the age-distance relationship in direction of growth through the



shells (**Figure 6**). These distances in growth direction on **cross** sections through the shells were interpreted as proxies for the growth rate of the individual during its life. ShellChron-based age models yield highly consistent age-distance relationships for different *T. sanchezi* specimens, regardless of whether they are based on Mg/Ca, Sr/Ca,  $\delta^{18}\text{O}_c$  or  $\delta^{13}\text{C}$  records (**Figure 6A**). Contrarily, growth models based on  $\delta^{18}\text{O}_c$  and  $\delta^{13}\text{C}$  values in *V. vesiculosus* and *O. figari* differed (**Figure 6B-C**).

Applying the Daydacna algorithm to trace element records through *T. sanchezi* specimen **B10** (for which subdaily-resolved trace element data is available) yielded independent evidence for the age-depth relationship in shells of *T. sanchezi* (see **Figure 6D**). Except for the Mg/Li record, all age-distance relationships obtained by applying Daydacna on trace element records through specimen **B10** closely agree with the age-distance relationship obtained through the combined ShellChron growth models for this and other *T. sanchezi* specimens (**Figure 6B**). Of the Daydacna results, the model based on Mg/Li ratios deviates most strongly from the other Daydacna results (based on Mg/Ca, Sr/Ca and Sr/Li records) and the stable isotope-based ShellChron age models. The close agreement between these age models generated using different algorithms, based on different environmental cycles (daily vs seasonal) on different geochemical records through the same specimen highlights the reproducibility of the age-distance relationship found for our assemblage of *T. sanchezi* specimens from the Saiwan ecosystem. This lends confidence to the interpretation that the observed rhythms in Mg/Ca, Sr/Ca and Sr/Li records in specimen **B10** represent daily cycles (de Winter et al., 2020) and allows us to refine our age model for this species to quantify growth rates on a monthly scale.

Isotope profiles in **Figure 4** and data on the precision of the ShellChron model outcomes in **Table 3** show that the seasonal pattern is in some specimens clearer in  $\delta^{18}\text{O}_c$  while others show clearer seasonality in the  $\delta^{13}\text{C}$  records. This translates to a better precision of  $\delta^{18}\text{O}_c$ -based age models in some specimens, while others have better defined age models based on  $\delta^{13}\text{C}$ . On average, the  $\delta^{18}\text{O}_c$ -based age models are more precise (23.1 days at 95% confidence level) than the  $\delta^{13}\text{C}$ -based age models (27.6 days at 95% confidence level; see **Table 3**). To account for inter-specimen differences, we decided to use the most precise growth model (either based on  $\delta^{18}\text{O}_c$  or  $\delta^{13}\text{C}$ ) available per specimen for determining the age-distance relationship.

**Table 3:** Median uncertainty (95% CL; in days) of growth models based on  $\delta^{18}\text{O}_c$  and  $\delta^{13}\text{C}$  profiles through all sequentially sampled specimens. For each specimen, the most precise age model is highlighted in bold.

| Specimen | Species               | $\delta^{18}\text{O}_c$ -based model<br>uncertainty (days) | $\delta^{13}\text{C}$ -based model<br>uncertainty (days) |
|----------|-----------------------|------------------------------------------------------------|----------------------------------------------------------|
| B6       | <i>V. vesiculosus</i> | 22.9                                                       | <b>17.7</b>                                              |
| B11      | <i>O. figari</i>      | <b>24.7</b>                                                | 57.4                                                     |
| B10      | <i>T. sanchezi</i>    | 22.0                                                       | <b>11.3</b>                                              |
| H576     | <i>T. sanchezi</i>    | <b>27.7</b>                                                | 32.3                                                     |
| H579A    | <i>T. sanchezi</i>    | <b>18.4</b>                                                | 40.4                                                     |
| H579B    | <i>T. sanchezi</i>    | <b>19.4</b>                                                | 39.2                                                     |
| H579C    | <i>T. sanchezi</i>    | 13.4                                                       | <b>10.2</b>                                              |
| H579D    | <i>T. sanchezi</i>    | 32.0                                                       | <b>27.2</b>                                              |
| H579E    | <i>T. sanchezi</i>    | 21.4                                                       | <b>9.3</b>                                               |
| H585     | <i>T. sanchezi</i>    | <b>29.0</b>                                                | 31.0                                                     |
| AVERAGE  |                       | <b>23.1</b>                                                | 27.6                                                     |





509

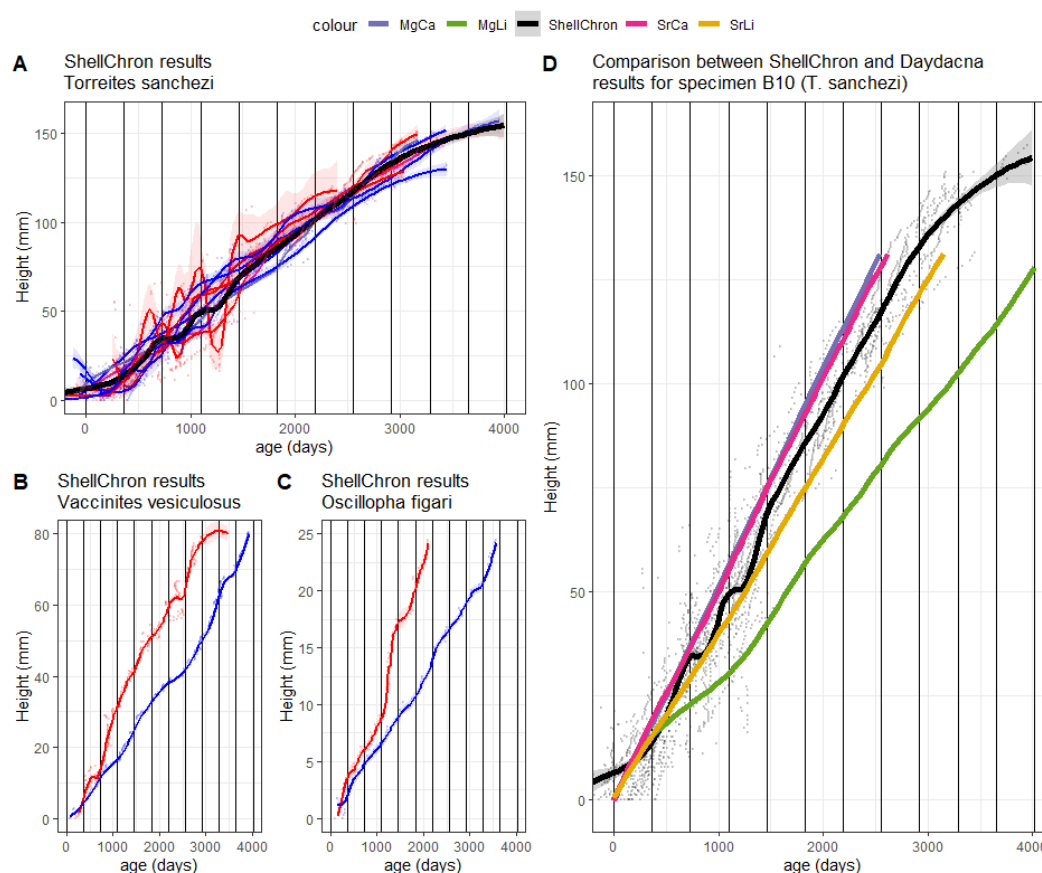

510

511 **Figure 6:** Plot of shell height vs. age in all specimens based on ShellChron modelling on Mg/Ca, Sr/Ca,  $\delta^{18}\text{O}_c$   
512 and  $\delta^{13}\text{C}$  profiles in *T. sanchezi* (A),  $\delta^{18}\text{O}_c$  and  $\delta^{13}\text{C}$  profiles in *V. vesiculosus* (B) and  $\delta^{18}\text{O}_c$  and  $\delta^{13}\text{C}$  profiles  
513 in *O. figari* (C). Solid lines represent LOESS smoothed curves (span = 0.2) through the age-height data, with  
514 shaded areas indicating uncertainties around the growth models. D) Comparison between ShellChron  
515 results for *T. sanchezi* specimen B10 profiles (combined chronology from all proxies; black line in panel A)  
516 and Daydacna results on subdaily-scale trace element profiles through the same specimen. Colours of  
517 curves and uncertainty envelopes represent the proxy on which age modelling was based (see legends in  
518 top-left corners of the panels).

### 519 3.4 Clumped isotope results

520 Clumped isotope analysis on *T. sanchezi* specimen HU-027 yielded a mean  $\Delta_{47}$  value of  $0.572 \pm 0.047$  ‰ I-  
521 CDES ( $1\sigma$ ). The clusters created from the clumped isotope dataset of specimen HU-027 highlight the  
522 relationship between  $\delta^{18}\text{O}_c$  values in *T. sanchezi* and the temperature and  $\delta^{18}\text{O}_w$  values reconstructed from  
523 clumped isotope thermometry (Figure 7). Clustering by location in the shell yields maximum reconstructed  
524 temperatures in HU-027 of  $44.2 \pm 4.0^\circ\text{C}$  and minimum temperatures of  $19.2 \pm 3.8^\circ\text{C}$ . These clusters in  
525 sample HU-027 sample a similar or larger spread in  $\delta^{18}\text{O}_c$ ,  $\delta^{13}\text{C}$  and  $\Delta_{47}$  compared to the statistical

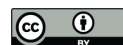

clustering approaches that do not take into account the sample location (maximum temperature range: 45.4 ± 17.1°C to 24.7 ± 4.3°C; see **Supplement S5** in the Zenodo repository), demonstrating that the sampling strategy successfully resolves the seasonal variability recorded in *T. sanchezi* specimen **HU-027**.

Interestingly, while the lowest  $\delta^{18}\text{O}_c$  values in *T. sanchezi* are associated with the highest temperatures, as one would expect assuming a constant  $\delta^{18}\text{O}_w$  value throughout the year, the highest  $\delta^{18}\text{O}_c$  values do not represent the coldest season. This suggests that the Saiwan environment in the Late Campanian experienced significant seasonal variability in  $\delta^{18}\text{O}_w$  values. Combining clumped and oxygen isotope data on the clusters shows indeed that they record excursions towards very low  $\delta^{18}\text{O}_w$  values ( $-4.63 \pm 0.86$  ‰VSMOW) in the coldest season, far off the  $\delta^{18}\text{O}_w$  value of  $-1$  ‰VSMOW commonly assumed for past greenhouse periods (Shackleton, 1986).

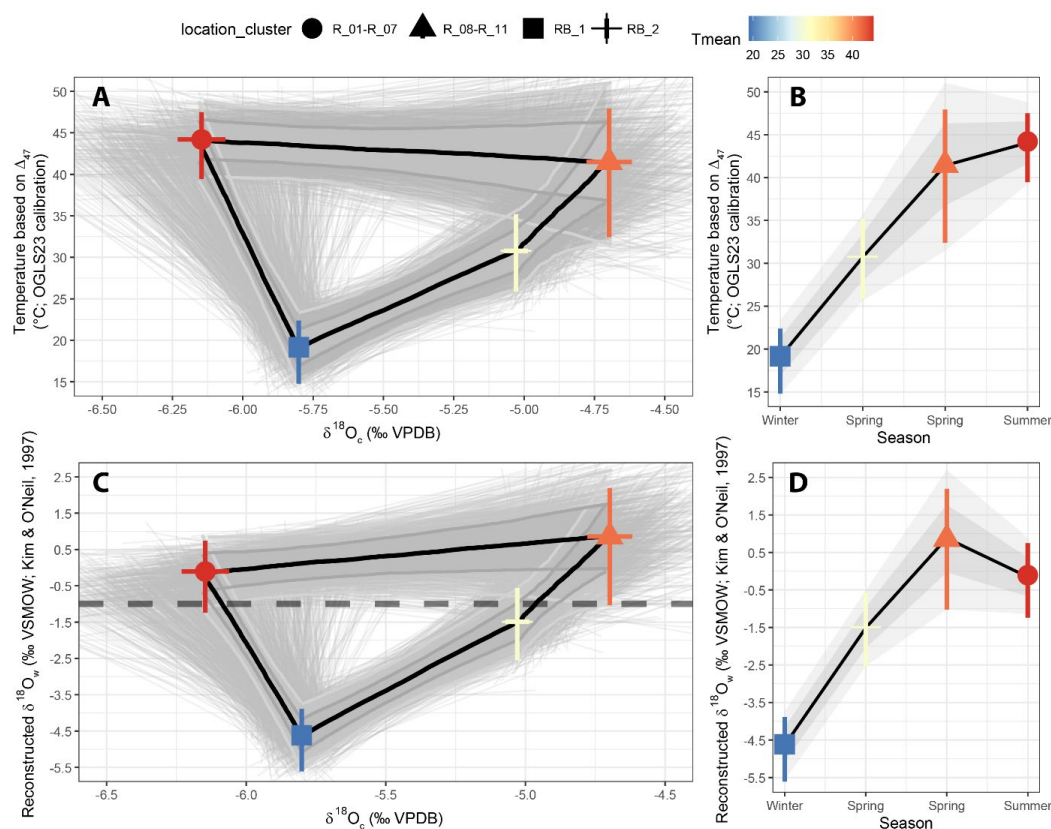

536

**Figure 7:** Relationship between temperature and  $\delta^{18}\text{O}_c$  values (A) and  $\delta^{18}\text{O}_w$  and  $\delta^{18}\text{O}_c$  values (C) in *T. sanchezi* shell based on four clusters of clumped isotope analyses through specimen **HU-027** grouped by location of the samples in the shell cross section (see symbol legend on top). Uncertainties on mean cluster values are reported as 95% confidence levels. The thin black lines and grey shading highlight individual Monte Carlo simulations (N = 1000) of the most likely shape of the  $\delta^{18}\text{O}_c$ -temperature and  $\delta^{18}\text{O}_c$ - $\delta^{18}\text{O}_w$  relationship and their 68% and 95% confidence levels. The horizontal dashed line in **C** indicates the common assumption of a constant  $\delta^{18}\text{O}_w$  value of  $-1$  ‰VSMOW throughout the year in the land ice-free



544 Late Cretaceous. Plots **B** and **D** show an interpretation of the seasonality in temperature and  $\delta^{18}\text{O}_w$  in the  
545 Saiwan environment based on these clusters.

## 546 **4. Discussion**

### 547 **4.1 Shell preservation**

548 Ancient shell carbonates, such as the rudists studied here, are known to be susceptible to various forms  
549 of diagenetic alteration (Al-Aasm and Veizer, 1986a, 1986b; Brand and Veizer, 1981, 1980; Ullmann and  
550 Korte, 2015). Common in carbonate systems, such as the carbonate platforms where the Saiwan rudists  
551 were growing, is open-system diagenesis, in which the diagenetic fluid with which the shell carbonate  
552 exchanges to alter its chemical and isotopic composition is continuously replaced (Al-Aasm and Veizer,  
553 1986a; Brand and Veizer, 1981). In such systems, the chemical and isotopic composition of carbonates  
554 moves away from its original value in an approximately linear trend (mixing line), typically resulting in  
555 increased concentrations of trace elements such as Mn and Fe, reduced concentrations of Sr and trends  
556 towards lower  $\delta^{18}\text{O}_c$  values in the carbonate (Al-Aasm and Veizer, 1986a, 1986b).

557 Our detailed geochemical investigation of specimens **B6**, **B10** and **B11** (**Figure 2**; **Figure 5**) highlights low  
558 Mn and Fe concentrations (typically  $<300\ \mu\text{g/g}$  and  $<200\ \mu\text{g/g}$ , respectively, below thresholds used by  
559 (Schmitt et al., 2022); see **Figure 5**) and high Sr concentrations (typically  $>1.0\ \text{mmol/mol}$ ; see **section 3.2**),  
560 which show a correlated, skewed distribution tailing towards a few locations on the shell where Mn and  
561 Fe concentrations are high and Sr concentrations are low, especially in *V. vesiculosus* specimen **B6** (**Figure**  
562 **5**). In *V. vesiculosus*, the trend of covarying elevated Mn and Fe concentrations and coinciding reductions  
563 in Mg/Ca and Sr/Ca clearly shows the imprint of local open-system diagenetic remineralization. Open  
564 system diagenesis was observed in isolated localities in these fossil shells, which were avoided during  
565 sampling for stable and clumped isotope analysis (see **section 2.2.3**). The chemical differences between  
566 well-preserved sections of the shells of these three taxa are likely to reflect taxon-specific variations in  
567 trace element concentrations, which are also common in modern molluscs and may reflect differences in  
568 shell microstructures and their associated formation pathways (e.g. Carré et al., 2006; Onuma et al., 1979).

569 Isotopic compositions of carbon and oxygen are often jointly depleted in diagenetically altered materials  
570 due to the exchange of shell carbonate with either isotopically depleted meteoric fluids during early  
571 diagenetic alteration (Allan and Matthews, 1990) or exchange with pore fluids under high temperatures  
572 (e.g. Brand and Veizer, 1981). However, a positive correlation between  $\delta^{18}\text{O}_c$  and  $\delta^{18}\text{C}$  values is not  
573 necessarily a reliable indicator of diagenetic alteration (Swart and Oehlert, 2018). Instead, a positive  
574 correlation between  $\delta^{18}\text{O}_c$  and  $\delta^{18}\text{C}$  values is often observed in modern (non-diagenetically altered)  
575 photosymbiotic species, such as tridacnids (Elliot et al., 2009; Killam et al., 2020), and have been proposed  
576 to be caused by seasonal changes in the isotopic composition of the dissolved inorganic carbon pool due  
577 to variability in the activity of photosymbionts in phase with the seasonal effect of temperature on the  
578 oxygen isotope composition of the shell (Elliot et al., 2009; McConnaughey and Gillikin, 2008). The fact  
579 that *T. sanchezi* specimens in our dataset exhibit a strong positive correlation between  $\delta^{18}\text{O}_c$  and  $\delta^{18}\text{C}$ ,  
580 while the other species do not, is corroborated by other evidence that *T. sanchezi* had photosymbionts  
581 such as the presence of specific adaptations in the shell thought to facilitate the hosting of photosymbiotic  
582 microorganisms in the mantle and the strong expression of diurnal cycles in shell structure and chemistry  
583 (see (N. J. de Winter et al., 2020; Skelton and Wright, 1987; Steuber, 1999)). We therefore disregard this  
584 as evidence for open-system diagenesis.



585 Grain boundary diffusion is another potential diagenetic process that can influence the isotopic  
586 composition of biogenic carbonates. This process is rapid on geological timescales (<100 years) and causes  
587 the exchange of oxygen isotopes with pore fluids (Adams et al., 2023; Cisneros-Lazaro et al., 2022;  
588 Nooitgedacht et al., 2021). In foraminifera, this process exchanges up to ~3% of the oxygen in the  
589 biomineral (Adams et al., 2023), meaning that even in the presence of strongly isotopically negative pore  
590 fluids this process can only change the  $\delta^{18}\text{O}_c$  value of the biomineral by a few tens of a permille, not enough  
591 to fully explain the high temperatures recorded in the fossils in this study.

592 Finally, our clumped isotope analysis results of specimen **HU-027** may be susceptible to solid state  
593 reordering of the clumped isotope signature, a form of closed-system diagenesis which occurs at elevated  
594 temperatures (>100 °C; Chen et al., 2019; Looser et al., 2023; Passey and Henkes, 2012; Stolper and Eiler,  
595 2015). This reordering effect requires large differences between the temperatures in which the carbonate  
596 was originally precipitated and the temperatures of the surrounding rocks and, when activated, is likely to  
597 affect the entire sample equally rapidly (on geological timescales; Henkes et al., 2014; Stolper and Eiler,  
598 2015). Similarly, heating carbonate samples to 175°C caused a resetting of the  $\Delta_{47}$  value through exchange  
599 with internal waters without noticeable change to  $\delta^{18}\text{O}_c$  values (Nooitgedacht et al., 2021). Given the fact  
600 that significant temperature variability is recorded by the clumped isotope dataset from specimen **HU-**  
601 **027**, and that the recorded temperatures are far from the temperatures needed for the solid-state  
602 reordering process to significantly affect isotopic clumping (>100 °C; Henkes et al., 2014), we feel confident  
603 in interpreting the recorded temperatures in terms of the paleoclimate and -environment at the Saiwan  
604 site.

#### 605 4.2 Seasonality in temperature and $\delta^{18}\text{O}_w$ value in Saiwan

606 The Monte Carlo simulations of the seasonal  $\delta^{18}\text{O}_c$ -  $\delta^{18}\text{O}_w$ -temperature path based on the clumped isotope  
607 dataset from specimen **HU-027** in **Figure 7** show a statistically significant difference between  
608 paleotemperatures and  $\delta^{18}\text{O}_w$  values between two parts of the annual cycle, especially for the middle  
609 range of the  $\delta^{18}\text{O}_c$  values of ( $\delta^{18}\text{O}_c$  between -5.0 and -6.0 ‰VPDB). Shell increments deposited after the  
610  $\delta^{18}\text{O}_c$  minimum record lower temperature and  $\delta^{18}\text{O}_w$  values, while parts of the shell before the  $\delta^{18}\text{O}_c$   
611 minimum record high temperature and  $\delta^{18}\text{O}_w$  values. High temperatures are reconstructed for both the  
612 extreme ends of the  $\delta^{18}\text{O}_c$  variability ( $\delta^{18}\text{O}_c < -6.0$  and  $\delta^{18}\text{O}_c > -5.0$  ‰VPDB). We interpret this as the  
613 signature of a shift in the temperature and  $\delta^{18}\text{O}_w$  maxima with respect to the  $\delta^{18}\text{O}_c$  cycle, with a high  
614 temperature extreme ( $44.2 \pm 4.0^\circ\text{C}$ ) at the low end of the  $\delta^{18}\text{O}_c$  cycle, which we interpret as a hot and dry  
615 summer season, and a milder temperature maximum ( $41.4 \pm 4.8^\circ\text{C}$ ) at the high end of the  $\delta^{18}\text{O}_c$  cycle,  
616 which we interpret as a warm and dry spring season (**Figure 7B & D**). The coldest and wettest season  
617 (winter) has such a low  $\delta^{18}\text{O}_w$  value ( $-4.64 \pm 0.86$  ‰ VSMOW) that it is not represented by the highest  
618  $\delta^{18}\text{O}_c$  values, as would be the case if  $\delta^{18}\text{O}_c$  would reflect a pure temperature signal (**Figure 7B & D**). This  
619 interpretation of the seasonality in Saiwan is also consistent with the temporal relationship between the  
620 clumped isotope sampling locations in specimen **HU-027**: Sample RB\_1 (winter) comes earliest in the  
621 chronology, closely followed by samples R\_8 – R\_11 (spring), and RB\_2 (spring) directly precedes R\_1 –  
622 R\_7 (summer). The latter two partly overlap later in the chronology (**Figure 2**). The result is a seasonality  
623 in which the temperature cycle and the hydrological cycle (reconstructed through the  $\delta^{18}\text{O}_w$  value) are out  
624 of phase. The  $\delta^{18}\text{O}_c$  value of carbonate precipitated under these conditions therefore exhibits hysteresis  
625 behaviour (see **Figure 7**). Based on the clumped isotope dataset from specimen **HU-027** alone, we  
626 reconstruct a seasonal sea surface temperature at Saiwan of  $19.2 \pm 3.8^\circ\text{C}$  to  $44.2 \pm 4.0^\circ\text{C}$ . The oxygen



isotopic composition of the seawater varied from  $-4.62 \pm 0.86$  ‰ VSMOW in winter to  $+0.86 \pm 1.6$  ‰ VSMOW in summer during the lifetime of specimen **HU-027**.

#### 4.3 Monthly temperature, $\delta^{18}\text{O}_w$ and growth rate at Saiwan

While the strong seasonal variability in  $\delta^{18}\text{O}_w$  value of the seawater in Saiwan contradicts the typical explanation of  $\delta^{18}\text{O}_c$  fluctuations in mollusc shells, the assumptions under which the ShellChron model operates (see **section 2.4.1**) are not violated by this observation. We believe our characterization of seasonal variability in temperature and  $\delta^{18}\text{O}_w$  value to be realistic for the following reasons:

Firstly, this temperature distribution over the year, which is offset in phase from the precipitation seasonality, is observed in modern tropical climates, especially those affected by monsoon-like precipitation seasonality.

Secondly, regardless of the  $\delta^{18}\text{O}_c$ -temperature relationship, our clumped isotope data shows that the maximum temperature is still recorded by the minimum  $\delta^{18}\text{O}_c$  value. Therefore, the combination of  $\delta^{18}\text{O}_c$  measurements and seasonal timing based on ShellChron or Daydacna will still assign the correct temperature,  $\delta^{18}\text{O}_w$  and growth rates to  $\delta^{18}\text{O}_c$  samples in each part of the year. The nonlinear  $\delta^{18}\text{O}_c$ -temperature relationship (**Figure 7**) therefore does not undermine the growth rate-temperature discussion.

Thirdly, the comparison between results from the Daydacna algorithm (which is independent from the isotope measurements) with our ShellChron results in specimen **B10** shows the same age for this specimen using both independent methods. If ShellChron would under- or overestimate the age of our specimens due to the nonlinear  $\delta^{18}\text{O}_c$ -temperature relationship, this would cause a mismatch between these results.

Finally, a previous study carried out on **B10** (de Winter et al., 2020) presents an analysis of the daily layers in specimen **B10** using multiple lines of evidence. The result of this study is that this specimen records on average 372 daily layers per  $\delta^{18}\text{O}_c$  cycle, consistent with astrophysical models of the slow-down of the axial rotation of Earth by friction in the Earth-Moon system, which influences the length of day on geological timescales. The hypothesis that  $\delta^{18}\text{O}_c$  cyclicity in *T. sanchezi* represents the full annual cycle (based on ShellChron results) is consistent with this evidence.

Considering the above, we combine information from age models with stable and clumped isotope data from specimen **HU-027** to estimate monthly mean temperature,  $\delta^{18}\text{O}_w$  and growth rate for all specimens in the dataset based on their  $\delta^{18}\text{O}_c$  values (see **section 2.4.4**). This further data analysis step works under the assumption that the clumped isotope data from specimen **HU-027** samples the seasonal variability in temperature and  $\delta^{18}\text{O}_w$  in Saiwan. We also assume that the ShellChron age models based on  $\delta^{18}\text{O}_c$  profiles in the other specimens are accurate enough to reliably distinguish between the hot, high- $\delta^{18}\text{O}_w$  and cooler low- $\delta^{18}\text{O}_w$  half of the annual cycle such that the correct  $\delta^{18}\text{O}_w$  value can be estimated for each  $\delta^{18}\text{O}_c$  value in the profile and the  $\delta^{18}\text{O}_c$  value can be used to estimate paleotemperature at that time of the year. Given the uncertainty of ShellChron age models for the  $\delta^{18}\text{O}_c$  profiles in our compilation (~28 days; see **Table 3**), we believe that our age models are accurate enough to do this.

**Figure 8** shows the spread in monthly temperature,  $\delta^{18}\text{O}_w$  and growth rate averages. **Table 4** also highlights the implications of the seasonal variability in  $\delta^{18}\text{O}_w$  throughout the year in the Saiwan environment (see



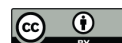

**Figure 7C-D):** Correcting  $\delta^{18}\text{O}_c$  values for  $\delta^{18}\text{O}_w$  variability in all specimens yields an average coldest month mean temperature (CMMT) of  $18.7 \pm 3.8^\circ\text{C}$  and a warmest month mean temperature (WMMT) of  $42.6 \pm 4.0^\circ\text{C}$  for the entire dataset. Mean annual average temperatures were  $33.1 \pm 4.6^\circ\text{C}$ . The uncertainties on these estimates are propagated from the uncertainties of the lowest and highest temperature cluster in the clumped isotope dataset (see **Table 2** and **Figure 7**).

Using the classical assumption of a seasonally constant  $\delta^{18}\text{O}_w$  value of  $-1\text{‰VSMOW}$  yields a considerably narrower and warmer monthly temperature range (CMMT – WMMT) of  $31.8 - 37.6^\circ\text{C}$ . Alternatively, when we exclude the coldest clumped isotope cluster in the **HU-027** dataset, which has a very low  $\delta^{18}\text{O}_w$  value of  $-4.62 \pm 0.86\text{‰VSMOW}$  (**Figure 7**), and might therefore be biased by strong seasonal influx of meteoric water, and assume the mean of the other three clusters ( $-0.25\text{‰VSMOW}$ ) as a constant  $\delta^{18}\text{O}_w$  value, the CMMT-WMMT range becomes  $35.7 - 41.8^\circ\text{C}$ . Recent studies demonstrated that the assumption of seasonally constant  $\delta^{18}\text{O}_w$  values in shallow marine environments often leads to an underestimation of the seasonal temperature range from  $\delta^{18}\text{O}_c$  measurements (e.g. de Winter et al., 2021b). We observe the same effect here and therefore use the seasonal temperature reconstructions that take into account seasonal  $\delta^{18}\text{O}_w$  variability from our clumped isotope *T. sanchezi* dataset throughout the remainder of the discussion.

**Table 4:** Overview of monthly mean, maximum and minimum estimates of  $\delta^{18}\text{O}_c$  (in  $\text{‰VPDB}$ ),  $\delta^{13}\text{C}$  (in  $\text{‰VPDB}$ ), temperature (in  $^\circ\text{C}$ ),  $\delta^{18}\text{O}_w$  (in  $\text{‰VSMOW}$ ) and growth rate (in  $\mu\text{m/day}$ ) per specimen. Note that temperature is estimated in three ways to test the sensitivity to different assumptions for the value of  $\delta^{18}\text{O}_w$ : Firstly, by using the  $\delta^{18}\text{O}_w$ -temperature relationship based on clumped isotope clusters in specimen **HU-027** (see **Fig. 7**). Secondly, by assuming the classical ice-free mean ocean value of  $-1\text{‰VSMOW}$ . Thirdly, by using the mean  $\delta^{18}\text{O}_w$  value based on the heaviest three clumped isotope clusters in specimen **HU-027** ( $-0.25\text{‰VSMOW}$ ; see **Fig. 7B**). In each temperature column, results for the different  $\delta^{18}\text{O}_c$  profiles depend on the same assumption of  $\delta^{18}\text{O}_w$  variability, so these seasonal temperature estimates are not fully independent from each other. Data given for specimen **HU-027** highlights the spread in temperature outcomes between the clusters instead of monthly values.

| specimen | profile | species                       | $\delta^{18}\text{O}$<br>( $\text{‰VPDB}$ ) |       |       | $\delta^{13}\text{C}$<br>( $\text{‰VPDB}$ ) |      |       | Temperature<br>( $^\circ\text{C}$ ; following<br>$\delta^{18}\text{O}_c$ -T<br>relationship from<br>clumped isotope<br>clusters) |      |      | Temperature<br>( $^\circ\text{C}$ ; assuming<br>$\delta^{18}\text{O}_w = -1$<br>$\text{‰VSMOW}$ ) |      |      | Temperature<br>( $^\circ\text{C}$ ; assuming<br>$\delta^{18}\text{O}_w = -0.25$<br>$\text{‰VSMOW}$ ) |      |      | $\delta^{18}\text{O}_w$<br>( $\text{‰VSMOW}$ ;<br>reconstructed from<br>clumped isotope<br>clusters) |      |       | Growth rate<br>( $\mu\text{m/d}$ ) |     |     |
|----------|---------|-------------------------------|---------------------------------------------|-------|-------|---------------------------------------------|------|-------|----------------------------------------------------------------------------------------------------------------------------------|------|------|---------------------------------------------------------------------------------------------------|------|------|------------------------------------------------------------------------------------------------------|------|------|------------------------------------------------------------------------------------------------------|------|-------|------------------------------------|-----|-----|
|          |         |                               | mean                                        | max   | min   | mean                                        | max  | min   | mean                                                                                                                             | max  | min  | mean                                                                                              | max  | min  | mean                                                                                                 | max  | min  | mean                                                                                                 | max  | min   | mean                               | max | min |
| B10      |         | <i>Torreites sanchezi</i>     | -5.37                                       | -5.04 | -5.73 | 1.13                                        | 1.51 | 0.72  | 31.8                                                                                                                             | 43.1 | 20.2 | 35.1                                                                                              | 37.1 | 33.4 | 39.2                                                                                                 | 41.2 | 37.4 | -1.69                                                                                                | 0.59 | -4.33 | 28                                 | 48  | 10  |
| B11      |         | <i>Oscillophora figari</i>    | -3.58                                       | -3.17 | -3.89 | 1.70                                        | 2.01 | 0.99  | 31.1                                                                                                                             | 33.8 | 12.5 | 25.9                                                                                              | 27.5 | 23.9 | 29.8                                                                                                 | 31.3 | 27.7 | 0.02                                                                                                 | 0.82 | -3.89 | 35                                 | 59  | 21  |
| B6       |         | <i>Vaccinites vesiculosus</i> | -4.08                                       | -3.44 | -4.57 | 0.81                                        | 1.04 | 0.67  | 31.6                                                                                                                             | 36.2 | 12.2 | 28.4                                                                                              | 30.9 | 25.2 | 32.3                                                                                                 | 34.9 | 29.0 | -0.40                                                                                                | 0.82 | -4.44 | 55                                 | 76  | 37  |
| H576     |         | <i>Torreites sanchezi</i>     | -5.73                                       | -5.25 | -6.23 | -0.07                                       | 0.76 | -1.00 | 32.8                                                                                                                             | 44.2 | 19.9 | 37.1                                                                                              | 39.8 | 34.5 | 41.2                                                                                                 | 44.0 | 38.5 | -1.87                                                                                                | 0.42 | -4.40 | 46                                 | 71  | 23  |
| H579     | A       | <i>Torreites sanchezi</i>     | -5.92                                       | -5.43 | -6.38 | -0.23                                       | 0.40 | -1.28 | 37.3                                                                                                                             | 45.1 | 22.7 | 38.1                                                                                              | 40.6 | 35.5 | 42.2                                                                                                 | 44.8 | 39.5 | -1.17                                                                                                | 0.28 | -3.65 | 43                                 | 80  | 19  |
| H579     | B       | <i>Torreites sanchezi</i>     | -5.46                                       | -4.99 | -6.36 | 0.16                                        | 0.71 | -0.87 | 35.0                                                                                                                             | 44.9 | 19.9 | 35.6                                                                                              | 40.5 | 33.1 | 39.7                                                                                                 | 44.7 | 37.1 | -1.15                                                                                                | 0.62 | -4.40 | 52                                 | 83  | 0   |
| H579     | C       | <i>Torreites sanchezi</i>     | -5.65                                       | -4.91 | -6.17 | 0.26                                        | 1.42 | -1.19 | 33.8                                                                                                                             | 44.0 | 19.9 | 36.6                                                                                              | 39.4 | 32.7 | 40.7                                                                                                 | 43.6 | 36.7 | -1.59                                                                                                | 0.53 | -4.40 | 41                                 | 116 | 0   |
| H579     | D       | <i>Torreites sanchezi</i>     | -5.49                                       | -4.81 | -5.90 | 0.49                                        | 1.36 | -0.78 | 29.1                                                                                                                             | 43.4 | 19.9 | 35.8                                                                                              | 38.0 | 32.2 | 39.9                                                                                                 | 42.1 | 36.2 | -2.33                                                                                                | 0.49 | -4.48 | 53                                 | 122 | 19  |
| H579     | E       | <i>Torreites sanchezi</i>     | -5.98                                       | -5.54 | -6.61 | -0.26                                       | 0.94 | -1.82 | 35.9                                                                                                                             | 46.3 | 19.3 | 38.4                                                                                              | 41.8 | 36.0 | 42.6                                                                                                 | 46.1 | 40.1 | -1.55                                                                                                | 0.27 | -4.57 | 62                                 | 94  | 4   |
| H579     | average | <i>Torreites sanchezi</i>     | -5.70                                       | -5.14 | -6.28 | 0.08                                        | 0.97 | -1.19 | 34.2                                                                                                                             | 44.7 | 20.3 | 36.9                                                                                              | 40.0 | 33.9 | 41.0                                                                                                 | 44.3 | 37.9 | -1.56                                                                                                | 0.44 | -4.30 | 50                                 | 99  | 8   |
| H585     |         | <i>Torreites sanchezi</i>     | -5.42                                       | -4.64 | -6.14 | -0.21                                       | 0.50 | -1.23 | 32.3                                                                                                                             | 43.7 | 19.8 | 35.4                                                                                              | 39.3 | 31.3 | 39.5                                                                                                 | 43.5 | 35.3 | -1.65                                                                                                | 0.82 | -4.44 | 39                                 | 60  | 12  |
| HU-027   |         | <i>Torreites sanchezi</i>     | -5.42                                       | -4.70 | -6.15 | 1.45                                        | 2.04 | 0.72  | 33.9                                                                                                                             | 44.2 | 19.2 | 35.4                                                                                              | 39.3 | 31.6 | 39.5                                                                                                 | 43.5 | 35.6 | -1.34                                                                                                | 0.86 | -4.62 |                                    |     |     |
| AVERAGE  |         |                               | -5.28                                       | -4.72 | -5.83 | 0.48                                        | 1.15 | -0.46 | 33.1                                                                                                                             | 42.6 | 18.7 | 34.7                                                                                              | 37.6 | 31.8 | 38.8                                                                                                 | 41.8 | 35.7 | -1.34                                                                                                | 0.59 | -4.33 | 45                                 | 81  | 15  |

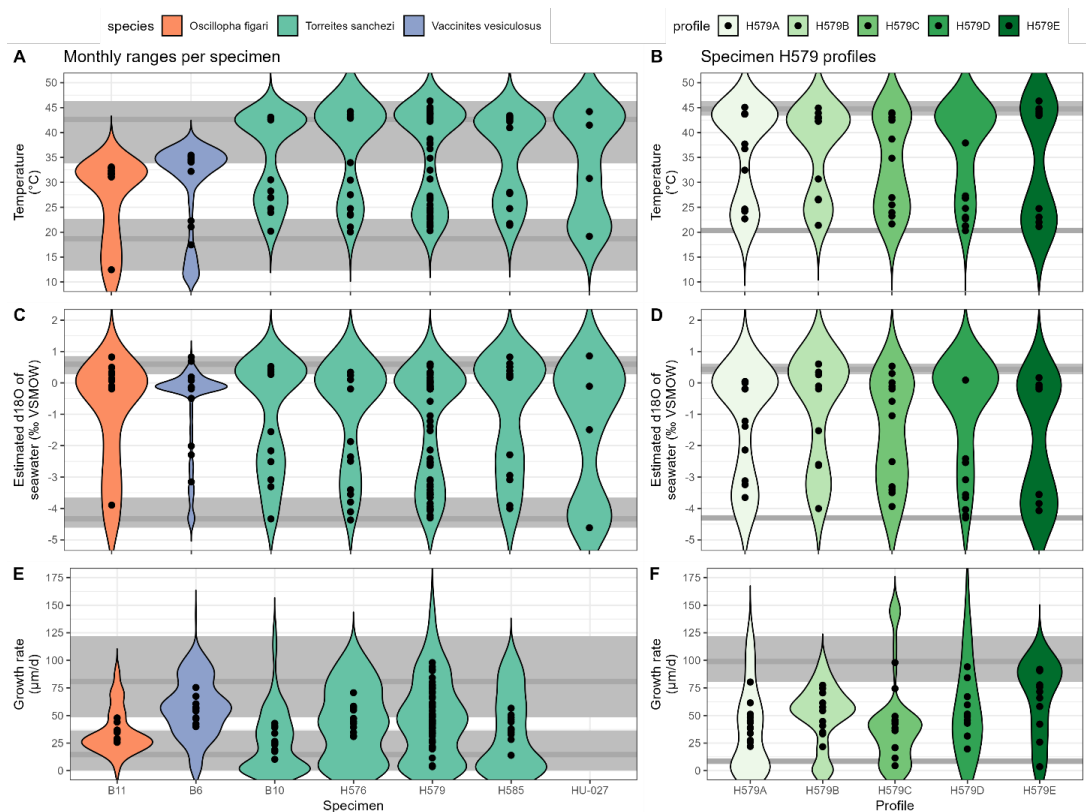

**Figure 8:** Variability in temperature (A-B), estimated  $\delta^{18}O_w$  (C-D) and growth rate (E-F) in all specimens (A, C & E) and in different profiles of specimen H579 (B, D & E). Coloured violin plots indicate the spread in the full dataset, while black symbols indicate monthly mean values. Grey horizontal lines show the highest and lowest monthly mean value, respectively, through the entire dataset (A, C & E) or specimen H579 (B, D & E) with shaded rectangles indicating variability around these values. Note that growth rates could not be estimated for specimen HU-027, and that the black symbols for this specimen in  $\delta^{18}O_w$  and temperature plots (A and C) indicate values for the four clusters (see Table 1) instead of monthly values.

#### 4.4 Inter-species differences

There is a significant difference between the  $\delta^{18}O_c$  ranges recorded in *V. vesiculosus*, *O. figari* and *T. sanchezi* in our dataset (see Figure 8 and Figure 9). When considering the seasonal  $\delta^{18}O_w$  variability in Saiwan, the *T. sanchezi* specimens record significantly higher temperatures in their shells (19.2 – 45.1 °C range of monthly temperatures, with an average of 33.6°C) than *V. vesiculosus* (12.2 – 36.2 °C; average: 31.6°C) and *O. figari* (12.5 – 33.8°C; average: 31.1°C). While the age models allow growth stops, it is possible that some months were not recorded by one or more of these species, reducing the seasonal range. This is also evident from the minimum monthly mean growth rate modelled from some  $\delta^{18}O_c$  profiles (e.g. in specimen H579; see Table 4) being zero.

Nevertheless, the inter-species difference is surprising, given that these specimens originated from the same biostrome (or directly above, in the case of *O. figari*; see Figure 1B-C). The lower temperatures (~2



710 ‰ higher mean  $\delta^{18}\text{O}_c$ ) recorded in *O. figari* may be attributed to its slightly higher stratigraphic position.  
711 Since the Saiwan site is embedded in a long stratigraphic record and is dated based on ammonite biozones,  
712 which yield a dating accuracy on the order of ~100 kyr (Lehmann, 2015), there remains some uncertainty  
713 to the (internal) age variability between the units (Kennedy et al., 2000; Schumann, 1995). Therefore, it is  
714 possible that the *O. figari* specimen studied here sampled a different climate and paleoenvironment than  
715 the other specimens. This different paleoenvironment may be characterized by a different  $\delta^{18}\text{O}_w$  value or  
716 seasonal  $\delta^{18}\text{O}_w$  range, resulting in a mild underestimation of paleotemperature and its seasonal range, or  
717 a true difference in ambient temperature during the lifetime of the oyster compared to the rudists. Since  
718 the mean  $\delta^{18}\text{O}_c$  value of *O. figari* is almost 2 ‰ higher than that of *T. sanchezi* (Table 4), mean annual  $\delta^{18}\text{O}_w$   
719 would have to have increased by 2 ‰ within a (geologically) very short time interval, given the close  
720 stratigraphic relationship between the species, to explain the difference. A plausible way to achieve such  
721 a change might be a shift in the seasonal  $\delta^{18}\text{O}_w$  regime: If the climate in which *O. figari* grew did not feature  
722 the highly  $\delta^{18}\text{O}_w$ -depleted winter season (see Figure 7) and instead featured year-round  $\delta^{18}\text{O}_w$  values close  
723 to -0.25 ‰VSMOW (the mean value of the summer and spring/autumn clusters in HU-027), the difference  
724 would explain ~1.2 ‰ of the 2 ‰ difference in the  $\delta^{18}\text{O}_c$  value. The remaining 0.8 ‰ offset between *O.*  
725 *figari* and *T. sanchezi* could then be explained by a drop in mean annual temperature of ~3.5°C over time  
726 based on a typical  $\delta^{18}\text{O}_c$ -temperature sensitivity of 4.3-4.5 °C/‰ (Epstein et al., 1953; Grossman and Ku,  
727 1986; Marchitto et al., 2014). In this scenario, the seasonal temperature range experienced by *O. figari*  
728 was roughly 27.7-31.3°C (average temperature of 29.8°C), ~1.3°C lower than the average temperature  
729 recorded by *O. figari* when accounting for the  $\delta^{18}\text{O}_w$  seasonality reconstructed by clumped isotope analysis  
730 in specimen HU-027, but with a significantly reduced seasonal variability (Table 4). Note that this constant  
731  $\delta^{18}\text{O}_w$  scenario would also significantly increase the estimated winter temperatures from *O. figari*, which  
732 are very low (12.5°C; see Table 4) when applying the  $\delta^{18}\text{O}_w$  seasonality from our clumped isotope data.  
733 We therefore consider it likely that that the strong drop in temperature and  $\delta^{18}\text{O}_w$  value that characterized  
734 the winter season in Saiwan may not be recorded in *O. figari* even if it occurred in the climate and  
735 environment of *O. figari*. The temperature distribution in Figure 9D further confirms this by showing that  
736 these exceptionally low winter temperatures in *O. figari* are represented by a small fraction of the data  
737 from this specimen, while the majority of the samples record estimated temperatures between 25°C and  
738 35°C.

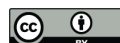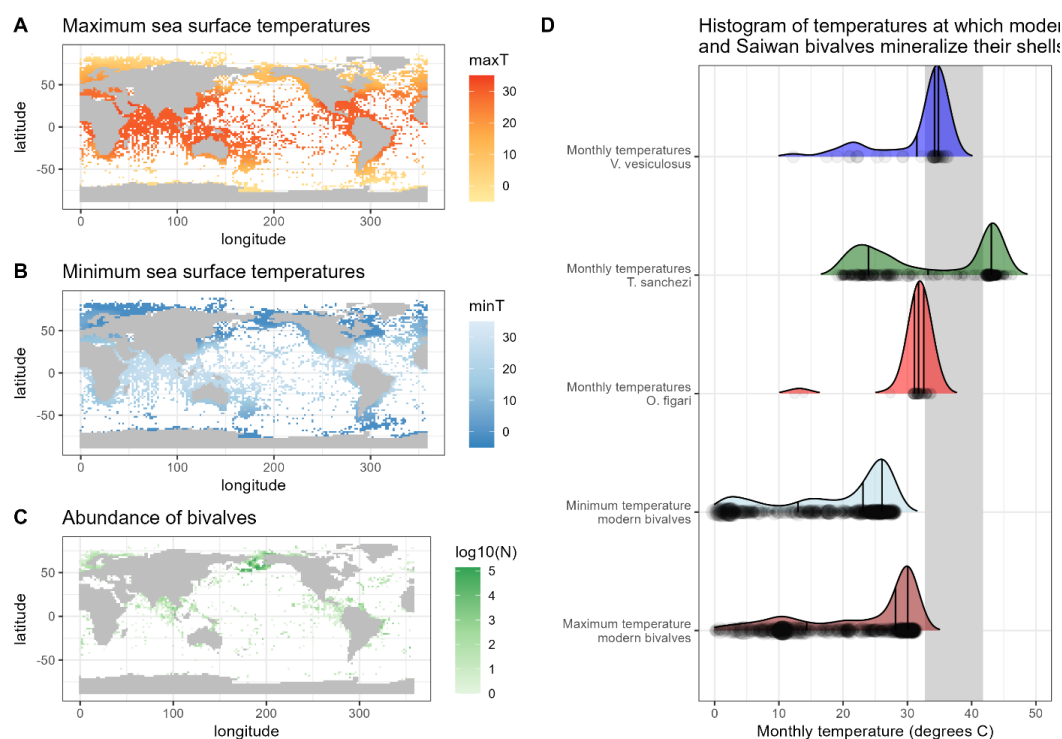

739

740 **Figure 9:** Overview of maximum (A) and minimum (B) modern monthly SST based on the NOAA SST dataset  
 741 (Huang et al., 2017) at locations of modern bivalve occurrences (C) based on the OBIS dataset (OBIS, 2020)  
 742 compared with the monthly temperatures reconstructed from the Saiwan fossil molluscs (D). The grey  
 743 rectangle in (D) marks the range of temperature limits for modern bivalves in the hottest shallow marine  
 744 environment studied in (Compton et al., 2007): Roebuck Bay.

745 This stratigraphic argument cannot explain the temperature differences between *V. vesiculosus* and *T.*  
 746 *sanchezi*, since they were sampled in life position from the same biostrome. Given the rapid growth of  
 747 these organisms (de Winter et al., 2020; de Winter et al., 2017) and the rapid build-up and succession of  
 748 the biostromes they are found in (Gili et al., 1995; Gili and Skelton, 2000; Ross and Skelton, 1993), it seems  
 749 likely that these organisms lived within geologically short time periods from each other (conservatively  
 750 less than 1000 years), and therefore sampled a similar climate in the Saiwan region. This seems plausible  
 751 considering the comparatively large overlap in the frequency distribution of temperatures recorded by  
 752 both species (Table 4; Figure 9D). The growth rate of *V. vesiculosus* was on average similar to that of *T.*  
 753 *sanchezi* (see Table 4 and Figure 8E) and the spatial sampling resolution in *V. vesiculosus* (250  $\mu$ m) was  
 754 often higher than that in *T. sanchezi* shells (~100-500  $\mu$ m (de Winter et al., 2017). Thus, it seems unlikely  
 755 that the differences between the seasonal ranges obtained from the shells of both species can be  
 756 attributed to undersampling of the full recorded temperature of *V. vesiculosus*, a source of variability  
 757 discussed in (de Winter et al., 2021a; Goodwin et al., 2003; Judd et al., 2017). Applying the high seasonal  
 758 range in  $\delta^{18}\text{O}_w$  observed in HU-027, the maximum monthly temperature recorded by *V. vesiculosus*  
 759 (36.2°C) is at least 5 degrees lower than the maximum monthly temperatures recorded in the *T. sanchezi*  
 760 specimens (>43°C in all specimens, average of 44°C; Table 4). At the same time, mean annual temperatures



in *V. vesiculosus* (31.6°C) and *T. sanchezi* (33.0°C) differ by less than 1.5 degrees. As in *O. figari*, winter temperatures in *V. vesiculosus* are exceptionally low compared to temperature ranges in other specimens in the assemblage (**Table 4**) and the temperature distribution in this specimen (**Figure 9D**). This is a consequence of the fact that winter datapoints in the *V. vesiculosus* dataset are associated with the very low  $\delta^{18}\text{O}_w$  values reconstructed from the winter datapoints in the clumped isotope dataset, resulting in low temperature estimates when applied on the  $\delta^{18}\text{O}_c$  values measured in *V. vesiculosus*. Since all *T. sanchezi* specimens yield consistent winter temperatures of ~20°C, we consider it plausible that *V. vesiculosus* did not record the seasonally low  $\delta^{18}\text{O}_w$  conditions and conclude that winter SSTs in Saiwan are more accurately estimated by the *T. sanchezi* data (19–20°C).

The growth rate of *T. sanchezi* specimens is diminished when the range of maximum tolerable temperatures (upper thermal limits) for modern bivalves occurring in hot, shallow marine settings (Roebuck Bay, Australia, tolerable thermal range: 32.7 – 41.8°C; (Compton et al., 2007)) is reached or exceeded (see **Supplement S6** in the Zenodo repository). While the frequency of temperatures recorded by *V. vesiculosus* and *O. figari* specimens in our dataset decreases when these maximum tolerable temperatures are reached (**Figure 10**), temperatures recorded in *T. sanchezi* specimens regularly exceed modern temperature maxima. Higher temperatures recorded in *T. sanchezi* specimens suggest that the upper thermal tolerance of this species may exceed those recorded in modern bivalves and that *T. sanchezi* had a higher temperature tolerance than *V. vesiculosus* and *O. figari*.

This conclusion is further supported by the observation that almost all studied *T. sanchezi* specimens record a monthly temperature range that exceeds that of *V. vesiculosus* (and *O. figari*; **Table 4**) and that the monthly temperature range recorded by *T. sanchezi* specimens is consistent (see **Figure 8B** and **Table 4**). The fact that all *T. sanchezi* specimens together record over 30 years of seasonality with consistently low summer  $\delta^{18}\text{O}_c$  values (monthly minima of -5.7 ‰VPDB or lower, corresponding to maximum monthly temperatures >40°C; see **Figure 3 & Table 4**) also shows that these conditions were not isolated events but a persistent feature of the local climate in Saiwan during the Campanian. Finally, daily rhythms in the shell chemistry of the large *T. sanchezi* specimen **B11** have previously revealed that this specimen likely grew year-round, and thus recorded the full seasonal temperature cycle (de Winter et al., 2020).

An important limitation to this inter-species paleoclimate comparison is that, while the  $\delta^{18}\text{O}_c$  profiles presented here record independent records of seasonal variability in different specimens, the interpretation of this  $\delta^{18}\text{O}_c$  variability in terms of paleotemperature relies on clumped isotope data collected in one specimen (**HU-027**). Our assumption that all rudist specimens occurred in the same biostrome and sampled a highly similar climate allows us to use the seasonal  $\delta^{18}\text{O}_w$  structure inferred from the clumped isotope dataset in **HU-027** to obtain temperature seasonality from  $\delta^{18}\text{O}_c$  profiles. Therefore, the temperature reconstructions from different  $\delta^{18}\text{O}_c$  profiles are not fully independent.

4.5 Campanian temperature extremes compared to modern climates – Implications for temperature tolerance in past shallow marine environments

**Figure 9A-C** presents an overview of the data on the occurrence of modern bivalves from the OBIS dataset (OBIS, 2020) cross-referenced with the monthly temperatures in these modern locations based on NOAA SST data (Huang et al., 2017) for the years 1981–2010. The lowest monthly temperature in environments containing modern bivalve recordings is -1.8°C. The maximum SST of the warmest month recorded in the NOAA dataset at any location in which modern bivalves are reported is 34.1°C. Based on the combination of these datasets, it becomes clear that the Saiwan environment was warmer than any shallow marine





environment that sustains bivalves in the modern world (**Figure 9D**). The range of temperatures experienced by bivalves in the warmest setting studied by (Compton et al., 2007; 32.7 – 41.8 °C) is frequently exceeded in the Saiwan environment according to the over 4°C higher mean WMMT estimated from our data ( $42.6 \pm 4.0$  °C; **Table 4**; **Figure 8A**). The warmest monthly temperatures in the Saiwan environment thus commonly exceed the maximum monthly temperatures in the living environments of modern bivalves, even when we consider the mean warmest monthly temperature for all specimens instead of the monthly extremes recorded by some *T. sanchezi* specimens in our dataset (44°C). When we consider that bivalves are known to stop growing their shell during stressful periods in the year (e.g. winter in most modern bivalves; Ivany (2012) and summer in some hotter climates Buick and Ivany (2004)), it may be possible (though perhaps unlikely) that the seasonal ranges recorded in our specimens from Saiwan underestimate the true seasonal temperature range in this paleo-environment.

Our clumped isotope data corroborates evidence based on stable oxygen isotope profiles through low-latitude Tethyan rudists (with assumptions of constant seawater  $\delta^{18}\text{O}_w$  value; e.g. ( de Winter et al., 2017; Steuber et al., 2005) that shallow seas in the Cretaceous Tethys Ocean margins warmed up to temperatures unseen in modern climates (**Figure 9**), but are not unheard of in the fossil record (e.g. Paleocene-Eocene Thermal Maximum tropical mean annual SSTs >40°C; (Aze et al., 2014)). Clumped isotope data from *T. sanchezi* specimen **HU-027** also reveals that assumptions of year-round constant  $\delta^{18}\text{O}_w$  value can be very far off from the true  $\delta^{18}\text{O}_w$  seasonality: In the Saiwan site, the coldest season recorded in **HU-027** is characterized by a mean  $\delta^{18}\text{O}_w$  value of  $-4.62 \pm 0.86$  ‰VSMOW, which is more than 5‰ lighter than the mean  $\delta^{18}\text{O}_w$  value during the warmest season ( $0.86 \pm 1.61$  ‰VSMOW). If  $\delta^{18}\text{O}_w$  would be considered constant year-round (e.g. -1 ‰VSMOW),  $\delta^{18}\text{O}_c$ -based temperature reconstructions would underestimate the true seasonality at this site during the Campanian by over 10°C (see discussion in **section 4.3** and results in **Table 4**). Our data instead shows that the low-latitude Saiwan paleoenvironment experienced a higher seasonal temperature range than the roughly contemporary (78 Ma) higher mid-latitudes of the Campanian boreal chalk sea recorded in shells from the Kristianstad basin ( $18.7 \pm 3.8$  –  $42.6 \pm 4.0$  °C, or  $23.9 \pm 6.4$  °C seasonal range for Saiwan vs  $15.3 \pm 4.8$  –  $26.6 \pm 5.4$  °C, or  $11.2 \pm 7.3$  °C seasonal range for Kristianstad basin), for which seasonal clumped isotope reconstructions were previously presented (de Winter et al., 2021b).

Note that the absolute mean annual temperature for the Saiwan ecosystem ( $33.1 \pm 4.6$  °C) was significantly higher than that of the higher latitude Boreal Chalk sea ( $20.1 \pm 1.3$  °C; de Winter et al. (2021b)), yielding a temperature gradient of ~13°C over the latitudes 3°S–50°N. The present-day mean annual sea surface temperatures at the closest weather stations to these localities are 8.2°C (Kristianstad, Sweden, 56°N (de Winter et al., 2021b; Huang et al., 2017)) and 27.9°C (Muscat, Oman, 23°N; (World Sea Temperatures, 2024)), yielding a present-day SST gradient of ~19°C, more than 1.5x that for the same locations in the Campanian. This result corroborates previous evidence from data and models that the latitudinal temperature gradient was smaller compared to the present-day during periods of warmer climate such as the Campanian (Amiot et al., 2004; Burgener et al., 2018). However, it must be noticed that the paleolatitudes of these sites are slightly different than their modern latitudes.

The Campanian climate in Saiwan is significantly different from that of present-day Oman, which experiences a sea surface temperature seasonality of  $24.2 \pm 1.6$  –  $31.5 \pm 1.6$  °C (World Sea Temperatures, 2024) and very limited seasonal precipitation range (0 – 11 mm/month; (climate-data.org, 2024)). The seasonal pattern in temperature and seawater composition in the Campanian is likely caused by large seasonal variability in precipitation, which is common in present-day tropical climates. In this climate,



846 seasons with hot and relatively dry conditions (summers) are interchanged with cooler seasons featuring  
847 an influx of isotopically light water which diluted the shallow seawater at Saiwan or produced a layer of  
848 lower salinity waters close to the sea surface which was recorded by these very shallow-dwelling  
849 photosymbiotic rudists.

850 The above-mentioned conditions make summers in the Saiwan paleoenvironment hot, even for the  
851 Campanian with its global mean annual temperature of 20-25°C (O'Brien et al., 2017). The fact that *T.*  
852 *sanchezi* apparently thrived under these conditions while *V. vesiculosus* and *O. figari* stopped producing  
853 their shell at temperatures close to those that limit modern shallow marine bivalves (~34°C; Clarke (2014);  
854 Compton et al. (2007)) and perhaps also during the high-precipitation and lower-salinity phases of the  
855 winter season suggests that *T. sanchezi* may have been particularly well-adapted to the high seasonality  
856 in temperature and precipitation and hot summers in its environment. This hypothesis is further supported  
857 by the observation that the genus *Torreites* occurs exclusively in the late Cretaceous low latitudes (18°N –  
858 29°N) of the near East and middle America (Global Biodiversity Information Facility, 2024). The  
859 unexpectedly high seasonal temperature variability in the Saiwan paleoenvironment (18.7 ± 3.8 – 42.6 ±  
860 4.0 °C ; **Table 4; Figure 8**) might have provided relief for the Saiwan molluscs, since they were not forced  
861 to complete their entire life cycle at exceptionally high temperatures and may have recovered from heat  
862 exposure during the cooler seasons.

863 While the conditions in Campanian Saiwan approach the limits of what has been observed for present-day  
864 eukaryotes (Clarke, 2014), recent growth experiments on modern gastropods show that temperatures up  
865 to 45°C can be tolerated by molluscs for limited amounts of time (Prayudi et al., 2024). Organisms that  
866 need to withstand these stressful heat conditions often develop specialized proteins and enzymes to  
867 continue bodily functions while experiencing close to lethal temperatures (Tehei et al., 2005; Tehei and  
868 Zaccai, 2007). While the Campanian fossils studied here do not preserve remnants of these organic  
869 molecules, it is probable that these molluscs employed similar strategies to survive through the extreme  
870 summer heat. We thus hypothesize that the members of the Saiwan ecosystem (especially *T. sanchezi*)  
871 must have been evolutionarily adapted to its seasonally hot environment. These observations raise the  
872 question whether, given enough time, multicellular organisms such as shallow marine bivalves may survive  
873 life in hotter climates, and to which degree the thermal tolerance of modern relatives can be used as a  
874 reference point for interpreting the fossil record. More research into extreme paleo-communities such as  
875 the Saiwan ecosystem is crucial for understanding the evolutionary limits to which metazoans can adapt  
876 to warmer climates, how much time is needed to make these adaptations, and whether such adaptation  
877 can come in time to save modern shallow marine communities from rapid climate change.

878

## 879 Acknowledgements

880 The authors would like to acknowledge the assistance of Leonard Bik with sample preparation. Arnold van  
881 Dijk and Desmond Eefting assisted with the stable isotope analyses in the Utrecht University lab. Stijn van  
882 Malderen is acknowledged for his assistance with the LA-ICP-MS measurements. This study has benefitted  
883 from discussions with Barbora Krizova, Barbara Goudsmit-Harzevoort, Jingjing Guo and Tobas Agterhuis  
884 during data processing of the clumped isotope results and from discussions with Pim Kaskes about the  
885 calibration and interpretation of micro-XRF results. PC and SG acknowledge funding from the Flemish  
886 Research Council (FWO; grant nr. G038022N) for financial support for the VUB XRF platform, as well as the  
887 VUB Strategic Research Program. NF was supported by a DAAD fellowship during her stay in the

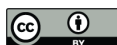

888 Netherlands and received funding from the EU Erasmus program to fund her lab visit. NJW is supported  
889 by an NWO VENI grant (grant nr.: VI.Veni.222.354) and chemical analyses carried out during this project  
890 were financially supported by an FWO junior postdoc grant (grant nr. 12ZB220N) and MSCA Individual  
891 Fellowship (UNBIAS; 843011) both awarded to NJW. *Torreites sanchezi* specimen HU-27 (BSc-thesis N. al-  
892 Fudhaili) was examined with micro-Raman spectroscopy at the University of Padova and we would like to  
893 acknowledge the help of Claudio Mazzoli, further Bryan Shirley at University of Erlangen (FAU-GZN) helped  
894 with EDS-mapping. HU-27 stable isotopes were kindly measured at FAU-GZN by Daniele Lutz and Michael  
895 Joachimski.

896

#### 897 **Data availability**

898 All chemical data and annotated Python (for the Daydacna routine) and R (for the remaining workflow)  
899 scripts used to carry out the data processing for this study are available in **Supplement S7** to this  
900 publication as well as through the open-access repository Zenodo  
901 (<https://doi.org/10.5281/zenodo.12567712>). Information about access to specimens **H576**, **H579** and  
902 **H585** is provided in (Steuber, 1999). Specimens **B10** and **B11** are archived in the Natural History Museum  
903 of Maastricht (the Netherlands), and specimen **B6** is archived in the Oertijdmuseum in Boxtel (the  
904 Netherlands). Specimen **HU-027** is archived at Geozentrum NordBayern at the Friedrich-Alexander  
905 Universität in Erlangen (Germany) and the material can be accessed by contacting Matthias López Correa  
906 ([matthias.lopez@fau.de](mailto:matthias.lopez@fau.de)) or Axel Munnecke ([axel.munnecke@fau.de](mailto:axel.munnecke@fau.de)).



## 907 References

- 908 Adams, A., Daval, D., Baumgartner, L.P., Bernard, S., Vennemann, T., Cisneros-Lazaro, D., Stolarski, J.,  
909 Baronnet, A., Grauby, O., Guo, J., Meibom, A., 2023. Rapid grain boundary diffusion in foraminifera  
910 tests biases paleotemperature records. *Commun Earth Environ* 4, 1–11.  
911 <https://doi.org/10.1038/s43247-023-00798-2>
- 912 Al-Aasm, I.S., Veizer, J., 1986a. Diagenetic stabilization of aragonite and low-Mg calcite, II. Stable isotopes  
913 in rudists. *Journal of Sedimentary Research* 56, 763–770.
- 914 Al-Aasm, I.S., Veizer, J., 1986b. Diagenetic Stabilization of Aragonite and Low-mg Calcite, I. Trace Elements  
915 in Rudists. *Journal of Sedimentary Research* 56.
- 916 Allan, J.R., Matthews, R.K., 1990. Isotope Signatures Associated with Early Meteoric Diagenesis, in:  
917 *Carbonate Diagenesis*. John Wiley & Sons, Ltd, pp. 197–217.  
918 <https://doi.org/10.1002/9781444304510.ch16>
- 919 Amiot, R., Lécuyer, C., Buffetaut, E., Fluteau, F., Legendre, S., Martineau, F., 2004. Latitudinal temperature  
920 gradient during the Cretaceous Upper Campanian–Middle Maastrichtian:  $\delta^{18}\text{O}$  record of  
921 continental vertebrates. *Earth and Planetary Science Letters* 226, 255–272.
- 922 Arndt, I., Coenen, D., Evans, D., Renema, W., Müller, W., 2023. Quantifying Sub-Seasonal Growth Rate  
923 Changes in Fossil Giant Clams Using Wavelet Transformation of Daily Mg/Ca Cycles. *Geochemistry,*  
924 *Geophysics, Geosystems* 24, e2023GC010992. <https://doi.org/10.1029/2023GC010992>
- 925 Aze, T., Pearson, P.N., Dickson, A.J., Badger, M.P.S., Bown, P.R., Pancost, R.D., Gibbs, S.J., Huber, B.T., Leng,  
926 M.J., Coe, A.L., Cohen, A.S., Foster, G.L., 2014. Extreme warming of tropical waters during the  
927 Paleocene–Eocene Thermal Maximum. *Geology* 42, 739–742. <https://doi.org/10.1130/G35637.1>
- 928 Batenburg, S.J., Reichart, G.-J., Jilbert, T., Janse, M., Wesselingh, F.P., Renema, W., 2011. Interannual  
929 climate variability in the Miocene: High resolution trace element and stable isotope ratios in giant  
930 clams. *Palaeogeography, Palaeoclimatology, Palaeoecology* 306, 75–81.
- 931 Bernasconi, S.M., Daëron, M., Bergmann, K.D., Bonifacie, M., Meckler, A.N., Affek, H.P., Anderson, N.,  
932 Bajnai, D., Barkan, E., Beverly, E., Blamart, D., Burgener, L., Calmels, D., Chaduteau, C., Clog, M.,  
933 Davidheiser-Kroll, B., Davies, A., Dux, F., Eiler, J., Elliott, B., Fetrow, A.C., Fiebig, J., Goldberg, S.,  
934 Hermoso, M., Huntington, K.W., Hyland, E., Ingalls, M., Jaggi, M., John, C.M., Jost, A.B., Katz, S.,  
935 Kelson, J., Kluge, T., Kocken, I.J., Laskar, A., Leutert, T.J., Liang, D., Lucarelli, J., Mackey, T.J.,  
936 Mangerot, X., Meinicke, N., Modestou, S.E., Müller, I.A., Murray, S., Neary, A., Packard, N., Passey,  
937 B.H., Pelletier, E., Petersen, S., Piasecki, A., Schauer, A., Snell, K.E., Swart, P.K., Tripathi, A., Upadhyay,  
938 D., Vennemann, T., Winkelstern, I., Yarian, D., Yoshida, N., Zhang, N., Ziegler, M., 2021. InterCarb:  
939 A Community Effort to Improve Interlaboratory Standardization of the Carbonate Clumped Isotope  
940 Thermometer Using Carbonate Standards. *Geochemistry, Geophysics, Geosystems* 22,  
941 e2020GC009588. <https://doi.org/10.1029/2020GC009588>
- 942 Bernasconi, S.M., Müller, I.A., Bergmann, K.D., Breitenbach, S.F., Fernandez, A., Hodell, D.A., Jaggi, M.,  
943 Meckler, A.N., Millan, I., Ziegler, M., 2018. Reducing uncertainties in carbonate clumped isotope  
944 analysis through consistent carbonate-based standardization. *Geochemistry, Geophysics,*  
945 *Geosystems* 19, 2895–2914.
- 946 Brand, U., Veizer, J., 1981. Chemical diagenesis of a multicomponent carbonate system-2: stable isotopes.  
947 *Journal of Sedimentary Research* 51, 987–997.
- 948 Brand, U., Veizer, J., 1980. Chemical diagenesis of a multicomponent carbonate system-1: Trace elements.  
949 *Journal of Sedimentary Research* 50.
- 950 Buick, D.P., Ivany, L.C., 2004. 100 years in the dark: Extreme longevity of Eocene bivalves from Antarctica.  
951 *Geology* 32, 921–924. <https://doi.org/10.1130/G20796.1>
- 952 Burgener, L., Hyland, E., Huntington, K.W., Kelson, J.R., Sewall, J.O., 2018. Revisiting the equable climate  
953 problem during the Late Cretaceous greenhouse using paleosol carbonate clumped isotope



- temperatures from the Campanian of the Western Interior Basin, USA. *Palaeogeography, Palaeoclimatology, Palaeoecology* 516, 244–267. <https://doi.org/10.1016/j.palaeo.2018.12.004>
- Burke, K.D., Williams, J.W., Chandler, M.A., Haywood, A.M., Lunt, D.J., Otto-Bliesner, B.L., 2018. Pliocene and Eocene provide best analogs for near-future climates. *PNAS* 115, 13288–13293. <https://doi.org/10.1073/pnas.1809600115>
- Carré, M., Bentaleb, I., Bruguier, O., Ordinola, E., Barrett, N.T., Fontugne, M., 2006. Calcification rate influence on trace element concentrations in aragonitic bivalve shells: Evidences and mechanisms. *Geochimica et Cosmochimica Acta* 70, 4906–4920. <https://doi.org/10.1016/j.gca.2006.07.019>
- Cermeño, P., García-Comas, C., Pohl, A., Williams, S., Benton, M.J., Chaudhary, C., Le Gland, G., Müller, R.D., Ridgwell, A., Vallina, S.M., 2022. Post-extinction recovery of the Phanerozoic oceans and biodiversity hotspots. *Nature* 607, 507–511. <https://doi.org/10.1038/s41586-022-04932-6>
- Chen, S., Ryb, U., Piasecki, A.M., Lloyd, M.K., Baker, M.B., Eiler, J.M., 2019. Mechanism of solid-state clumped isotope reordering in carbonate minerals from aragonite heating experiments. *Geochimica et Cosmochimica Acta* 258, 156–173. <https://doi.org/10.1016/j.gca.2019.05.018>
- Cisneros-Lazaro, D., Adams, A., Guo, J., Bernard, S., Baumgartner, L.P., Daval, D., Baronnet, A., Grauby, O., Vennemann, T., Stolarski, J., Escrig, S., Meibom, A., 2022. Fast and pervasive diagenetic isotope exchange in foraminifera tests is species-dependent. *Nat Commun* 13, 113. <https://doi.org/10.1038/s41467-021-27782-8>
- Clarke, A., 2014. The thermal limits to life on Earth. *International Journal of Astrobiology* 13, 141–154. <https://doi.org/10.1017/S1473550413000438>
- climate-data.org, 2024. Duqm climate [WWW Document]. URL <https://en.climate-data.org/asia/oman/al-wusta/duqm-151282/> (accessed 5.24.24).
- cluster package [WWW Document], 2023. URL <https://www.rdocumentation.org/packages/cluster/versions/2.1.6> (accessed 11.27.24).
- Compton, T.J., Rijkenberg, M.J.A., Drent, J., Piersma, T., 2007. Thermal tolerance ranges and climate variability: A comparison between bivalves from differing climates. *Journal of Experimental Marine Biology and Ecology* 352, 200–211. <https://doi.org/10.1016/j.jembe.2007.07.010>
- Daëron, M., Vermeesch, P., 2023. Omnivariant generalized least squares regression: Theory, geochronological applications, and making the case for reconciled  $\Delta 47$  calibrations. *Chemical Geology* 121881. <https://doi.org/10.1016/j.chemgeo.2023.121881>
- de Winter, N., Sinnesael, M., Makarona, C., Vansteenberge, S., Claeys, P., 2017. Trace element analyses of carbonates using portable and micro-X-ray fluorescence: Performance and optimization of measurement parameters and strategies. *Journal of Analytical Atomic Spectrometry*. <https://doi.org/10.1039/c6ja00361c>
- De Winter, N., Vinzenz Ullmann, C., Sorenson, A., Thibault, N., Claeys, P., 2018. Inter- and intra-specific variability in shell chemistry of well-preserved bivalve shells from the Early Campanian (Late Cretaceous) Kristianstad Basin in Scania, Sweden. *Geophysical Research Abstracts* 20, 1.
- de Winter, N.J., 2021. ShellChron 0.2.8: A new tool for constructing chronologies in accretionary carbonate archives from stable oxygen isotope profiles. *Geoscientific Model Development Discussions* 1–37. <https://doi.org/10.5194/gmd-2020-401>
- de Winter, N.J., Agterhuis, T., Ziegler, M., 2021a. Optimizing sampling strategies in high-resolution paleoclimate records. *Climate of the Past* 17, 1315–1340. <https://doi.org/10.5194/cp-17-1315-2021>
- de Winter, N.J., Claeys, P., 2016. Micro X-ray fluorescence ( $\mu$ XRF) line scanning on Cretaceous rudist bivalves: A new method for reproducible trace element profiles in bivalve calcite. *Sedimentology* 64, 231–251. <https://doi.org/10.1111/sed.12299>
- de Winter, N.J., Goderis, S., Dehairs, F., Jagt, J.W.M., Fraaije, R.H.B., Van Malderen, S.J.M., Vanhaecke, F., Claeys, P., 2017. Tropical seasonality in the late Campanian (late Cretaceous): Comparison



- 1002 between multiproxy records from three bivalve taxa from Oman. *Palaeogeography,*  
1003 *Palaeoclimatology, Palaeoecology* 485, 740–760. <https://doi.org/10.1016/j.palaeo.2017.07.031>
- 1004 de Winter, N. J., Goderis, S., Malderen, S.J.M.V., Sinnesael, M., Vansteenberge, S., Snoeck, C., Belza, J.,  
1005 Vanhaecke, F., Claeys, P., 2020. Subdaily-Scale Chemical Variability in a *Torreites Sanchezi* Rudist  
1006 Shell: Implications for Rudist Paleobiology and the Cretaceous Day-Night Cycle. *Paleoceanography*  
1007 *and Palaeoclimatology* 35, e2019PA003723. <https://doi.org/10.1029/2019PA003723>
- 1008 de Winter, N.J., Müller, I.A., Kocken, I.J., Thibault, N., Ullmann, C.V., Farnsworth, A., Lunt, D.J., Claeys, P.,  
1009 Ziegler, M., 2021b. Absolute seasonal temperature estimates from clumped isotopes in bivalve  
1010 shells suggest warm and variable greenhouse climate. *Commun Earth Environ* 2, 1–8.  
1011 <https://doi.org/10.1038/s43247-021-00193-9>
- 1012 de Winter, N.J., Tindall, J., Johnson, A.L.A., Goudsmit-Harzevoort, B., Wichern, N., Kaskes, P., Claeys, P.,  
1013 Huygen, F., van Leeuwen, S., Metcalfe, B., Bakker, P., Goolaerts, S., Wesselingh, F., Ziegler, M., 2024.  
1014 Amplified seasonality in western Europe in a warmer world. *Science Advances* 10, eadl6717.  
1015 <https://doi.org/10.1126/sciadv.adl6717>
- 1016 de Winter, Niels J., Vellekoop, J., Clark, A.J., Stassen, P., Speijer, R.P., Claeys, P., 2020. The giant marine  
1017 gastropod *Campanile giganteum* (Lamarck, 1804) as a high-resolution archive of seasonality in the  
1018 Eocene greenhouse world. *Geochemistry, Geophysics, Geosystems* 21, e2019GC008794.  
1019 <https://doi.org/10.1029/2019GC008794>
- 1020 Dowsett, H.J., Foley, K.M., Stoll, D.K., Chandler, M.A., Sohl, L.E., Bentsen, M., Otto-Bliesner, B.L., Bragg, F.J.,  
1021 Chan, W.-L., Contoux, C., Dolan, A.M., Haywood, A.M., Jonas, J.A., Jost, A., Kamae, Y., Lohmann,  
1022 G., Lunt, D.J., Nisancioglu, K.H., Abe-Ouchi, A., Ramstein, G., Riesselman, C.R., Robinson, M.M.,  
1023 Rosenbloom, N.A., Salzmann, U., Stepanek, C., Strother, S.L., Ueda, H., Yan, Q., Zhang, Z., 2013.  
1024 Sea Surface Temperature of the mid-Piacenzian Ocean: A Data-Model Comparison. *Sci Rep* 3,  
1025 2013. <https://doi.org/10.1038/srep02013>
- 1026 Elliot, M., Welsh, K., Chilcott, C., McCulloch, M., Chappell, J., Ayling, B., 2009. Profiles of trace elements  
1027 and stable isotopes derived from giant long-lived *Tridacna gigas* bivalves: Potential applications in  
1028 paleoclimate studies. *Palaeogeography, Palaeoclimatology, Palaeoecology* 280, 132–142.  
1029 <https://doi.org/10.1016/j.palaeo.2009.06.007>
- 1030 Epstein, S., Buchsbaum, R., Lowenstam, H.A., Urey, H.C., 1953. Revised carbonate-water isotopic  
1031 temperature scale. *Geological Society of America Bulletin* 64, 1315–1326.
- 1032 Evans, D., Müller, W., Oron, S., Renema, W., 2013. Eocene seasonality and seawater alkaline earth  
1033 reconstruction using shallow-dwelling large benthic foraminifera. *Earth and Planetary Science*  
1034 *Letters* 381, 104–115.
- 1035 Gili, E., Götz, S., 2018. Treatise Online no. 103: Part N, Volume 2, Chapter 26B: Paleoecology of rudists. 1.  
1036 <https://doi.org/10.17161/to.v0i0.7183>
- 1037 Gili, E., Skelton, P.W., 2000. Factors regulating the development of elevator rudist congregations.  
1038 *Geological Society, London, Special Publications* 178, 109–116.  
1039 <https://doi.org/10.1144/GSL.SP.2000.178.01.08>
- 1040 Gili, E., Skelton, P.W., Vicens, E., Obrador, A., 1995. Corals to rudists—an environmentally induced  
1041 assemblage succession. *Palaeogeography, Palaeoclimatology, Palaeoecology,*  
1042 *Palaeoenvironmental Models for the Benthic Associations of Cretaceous Carbonate Platforms in*  
1043 *the Tethyan Realm* 119, 127–136. [https://doi.org/10.1016/0031-0182\(95\)00064-X](https://doi.org/10.1016/0031-0182(95)00064-X)
- 1044 Global Biodiversity Information Facility, 2024. Global Biodiversity Information Facility: *Torreites* [WWW  
1045 Document]. URL <https://www.gbif.org/species/4591957> (accessed 5.10.24).
- 1046 Goodwin, D.H., Schöne, B.R., Dettman, D.L., 2003. Resolution and Fidelity of Oxygen Isotopes as  
1047 Paleotemperature Proxies in Bivalve Mollusk Shells: Models and Observations. *PALAIOS* 18, 110–  
1048 125. [https://doi.org/10.1669/0883-1351\(2003\)18<110:RAFOOI>2.0.CO;2](https://doi.org/10.1669/0883-1351(2003)18<110:RAFOOI>2.0.CO;2)
- 1049 Gradstein, F.M., Ogg, J.G., Schmitz, M.D., Ogg, G.M., 2020. *Geologic Time Scale 2020*. Elsevier.





- 1050 Grossman, E.L., Ku, T.-L., 1986. Oxygen and carbon isotope fractionation in biogenic aragonite:  
1051 temperature effects. *Chemical Geology: Isotope Geoscience section* 59, 59–74.
- 1052 Hartigan, J.A., Wong, M.A., 1979. Algorithm AS 136: A K-Means Clustering Algorithm. *Journal of the Royal*  
1053 *Statistical Society. Series C (Applied Statistics)* 28, 100–108. <https://doi.org/10.2307/2346830>
- 1054 Harzhauser, M., Piller, W.E., Müllegger, S., Grunert, P., Micheels, A., 2011. Changing seasonality patterns in  
1055 Central Europe from Miocene Climate Optimum to Miocene Climate Transition deduced from the  
1056 *Crassostrea* isotope archive. *Global and Planetary Change* 76, 77–84.  
1057 <https://doi.org/10.1016/j.gloplacha.2010.12.003>
- 1058 He, B., Olack, G.A., Colman, A.S., 2012. Pressure baseline correction and high-precision CO<sub>2</sub> clumped-  
1059 isotope ( $\Delta 47$ ) measurements in bellows and micro-volume modes. *Rapid Communications in*  
1060 *Mass Spectrometry* 26, 2837–2853.
- 1061 Henkes, G.A., Passey, B.H., Grossman, E.L., Shenton, B.J., Pérez-Huerta, A., Yancey, T.E., 2014. Temperature  
1062 limits for preservation of primary calcite clumped isotope paleotemperatures. *Geochimica et*  
1063 *cosmochimica acta* 139, 362–382.
- 1064 Huang, B., Thorne, P.W., Banzon, V.F., Boyer, T., Chepurin, G., Lawrimore, J.H., Menne, M.J., Smith, T.M.,  
1065 Vose, R.S., Zhang, H.-M., 2017. NOAA extended reconstructed sea surface temperature (ERSST),  
1066 version 5. NOAA National Centers for Environmental Information 30, 25.
- 1067 Huyghe, D., Merle, D., Lartaud, F., Cheype, E., Emmanuel, L., 2012. Middle Lutetian climate in the Paris  
1068 Basin: implications for a marine hotspot of paleobiodiversity. *Facies* 58, 587–604.
- 1069 IPCC, 2023. SYNTHESIS REPORT OF THE IPCC SIXTH ASSESSMENT REPORT (AR6). Intergovernmental Panel  
1070 on Climate Change, Geneva, Switzerland.
- 1071 Ivany, L.C., 2012. Reconstructing paleoseasonality from accretionary skeletal carbonates—challenges and  
1072 opportunities. *The Paleontological Society Papers* 18, 133–166.
- 1073 Jones, D.S., 1983. Sclerochronology: reading the record of the molluscan shell: annual growth increments  
1074 in the shells of bivalve molluscs record marine climatic changes and reveal surprising longevity.  
1075 *American Scientist* 71, 384–391.
- 1076 Jones, M.M., Petersen, S.V., Curley, A.N., 2022. A tropically hot mid-Cretaceous North American Western  
1077 Interior Seaway. *Geology* 50, 954–958. <https://doi.org/10.1130/G49998.1>
- 1078 Judd, E.J., Wilkinson, B.H., Ivany, L.C., 2017. The life and time of clams: Derivation of intra-annual growth  
1079 rates from high-resolution oxygen isotope profiles. *Palaeogeography, Palaeoclimatology,*  
1080 *Palaeoecology.* <https://doi.org/10.1016/j.palaeo.2017.09.034>
- 1081 Kaufman, L., Rousseeuw, P.J., 1990. Partitioning Around Medoids (Program PAM), in: *Finding Groups in*  
1082 *Data.* John Wiley & Sons, Ltd, pp. 68–125. <https://doi.org/10.1002/9780470316801.ch2>
- 1083 Kennedy, W.J., Jagt, J.W.M., Hanna, S.S., Schulp, A.S., 2000. Late Campanian ammonites from the Saiwan  
1084 area (Huqf Desert, Sultanate of Oman). *Cretaceous Research* 21, 553–562.  
1085 <https://doi.org/10.1006/cres.2000.0217>
- 1086 Killam, D., Thomas, R., Al-Najjar, T., Clapham, M., 2020. Interspecific and Intrashell Stable Isotope Variation  
1087 Among the Red Sea Giant Clams. *Geochemistry, Geophysics, Geosystems* 21, e2019GC008669.  
1088 <https://doi.org/10.1029/2019GC008669>
- 1089 Kim, S.-T., O’Neil, J.R., 1997. Equilibrium and nonequilibrium oxygen isotope effects in synthetic  
1090 carbonates. *Geochimica et Cosmochimica Acta* 61, 3461–3475.
- 1091 Lehmann, J., 2015. Ammonite Biostratigraphy of the Cretaceous—An Overview, in: Klug, C., Korn, D., De  
1092 Baets, K., Kruta, I., Mapes, R.H. (Eds.), *Ammonoid Paleobiology: From Macroevolution to*  
1093 *Paleogeography.* Springer Netherlands, Dordrecht, pp. 403–429. [https://doi.org/10.1007/978-94-](https://doi.org/10.1007/978-94-017-9633-0_15)  
1094 [017-9633-0\\_15](https://doi.org/10.1007/978-94-017-9633-0_15)
- 1095 Looser, N., Petschnig, P., Hemingway, J.D., Fernandez, A., Morales Grafulha, L., Perez-Huerta, A., Vickers,  
1096 M.L., Price, G.D., Schmidt, M.W., Bernasconi, S.M., 2023. Thermally-induced clumped isotope



- 1097           resetting in belemnite and optical calcites: Towards material-specific kinetics. *Geochimica et*  
1098           *Cosmochimica Acta* 350, 1–15. <https://doi.org/10.1016/j.gca.2023.03.030>
- 1099   Maechler, M., original), P.R. (Fortran, original), A.S. (S, original), M.H. (S, Hornik [trl, K., maintenance(1999-  
1100           2000)), ctb] (port to R., Studer, M., Roudier, P., Gonzalez, J., Kozłowski, K., pam()), E.S. (fastpam  
1101           options for, Murphy (volume.ellipsoid({d >= 3})), K., 2023. cluster: “Finding Groups in Data”:  
1102           Cluster Analysis Extended Rousseeuw et al.
- 1103   Marchitto, T.M., Curry, W.B., Lynch-Stieglitz, J., Bryan, S.P., Cobb, K.M., Lund, D.C., 2014. Improved oxygen  
1104           isotope temperature calibrations for cosmopolitan benthic foraminifera. *Geochimica et*  
1105           *Cosmochimica Acta* 130, 1–11.
- 1106   McConnaughey, T.A., Gillikin, D.P., 2008. Carbon isotopes in mollusk shell carbonates. *Geo-Marine Letters*  
1107           28, 287–299. <https://doi.org/10.1007/s00367-008-0116-4>
- 1108   Müller, I.A., Fernandez, A., Radke, J., van Dijk, J., Bowen, D., Schwieters, J., Bernasconi, S.M., 2017.  
1109           Carbonate clumped isotope analyses with the long-integration dual-inlet (LIDI) workflow:  
1110           scratching at the lower sample weight boundaries: LIDI as key for more precise analyses on much  
1111           less carbonate material. *Rapid Communications in Mass Spectrometry* 31, 1057–1066.  
1112           <https://doi.org/10.1002/rcm.7878>
- 1113   Nooitgedacht, C.W., van der Lubbe, H.J.L., Ziegler, M., Staudigel, P.T., 2021. Internal Water Facilitates  
1114           Thermal Resetting of Clumped Isotopes in Biogenic Aragonite. *Geochemistry, Geophysics,*  
1115           *Geosystems* 22, e2021GC009730. <https://doi.org/10.1029/2021GC009730>
- 1116   OBIS, 2020. Ocean biodiversity information system.
- 1117   O’Brien, C.L., Robinson, S.A., Pancost, R.D., Sinninghe Damsté, J.S., Schouten, S., Lunt, D.J., Alsenz, H.,  
1118           Bornemann, A., Bottini, C., Brassell, S.C., Farnsworth, A., Forster, A., Huber, B.T., Inglis, G.N.,  
1119           Jenkyns, H.C., Linnert, C., Littler, K., Markwick, P., McAnena, A., Mutterlose, J., Naafs, B.D.A.,  
1120           Püttmann, W., Sluijs, A., van Helmond, N.A.G.M., Vellekoop, J., Wagner, T., Wrobel, N.E., 2017.  
1121           Cretaceous sea-surface temperature evolution: Constraints from TEX 86 and planktonic  
1122           foraminiferal oxygen isotopes. *Earth-Science Reviews* 172, 224–247.  
1123           <https://doi.org/10.1016/j.earscirev.2017.07.012>
- 1124   O’Hora, H.E., Petersen, S.V., Vellekoop, J., Jones, M.M., Scholz, S.R., 2022. Clumped-isotope-derived  
1125           climate trends leading up to the end-Cretaceous mass extinction in northwestern Europe. *Climate*  
1126           *of the Past* 18, 1963–1982. <https://doi.org/10.5194/cp-18-1963-2022>
- 1127   Onuma, N., Masuda, F., Hirano, M., Wada, K., 1979. Crystal structure control on trace element partition in  
1128           molluscan shell formation. *Geochemical Journal* 13, 187–189.
- 1129   Passey, B.H., Henkes, G.A., 2012. Carbonate clumped isotope bond reordering and geospeedometry. *Earth*  
1130           *and Planetary Science Letters* 351–352, 223–236. <https://doi.org/10.1016/j.epsl.2012.07.021>
- 1131   Petersen, S.V., Tabor, C.R., Lohmann, K.C., Poulsen, C.J., Meyer, K.W., Carpenter, S.J., Erickson, J.M.,  
1132           Matsunaga, K.K., Smith, S.Y., Sheldon, N.D., 2016a. Temperature and salinity of the Late Cretaceous  
1133           western interior seaway. *Geology* 44, 903–906.
- 1134   Petersen, S.V., Winkelstern, I.Z., Lohmann, K.C., Meyer, K.W., 2016b. The effects of Porapak™ trap  
1135           temperature on  $\delta^{18}\text{O}$ ,  $\delta^{13}\text{C}$ , and  $\Delta 47$  values in preparing samples for clumped isotope analysis.  
1136           *Rapid Communications in Mass Spectrometry* 30, 199–208.
- 1137   Philip, J.M., Platel, J.-P., 1995. Stratigraphy and rudist biozonation of the Campanian and the Maastrichtian  
1138           of Eastern Oman. *Revista mexicana de ciencias geológicas* 12, 15.
- 1139   Prayudi, S.D., Korin, A., Kaminski, M.A., 2024. Thermal tolerance of intertidal gastropods in the Western  
1140           Arabian Gulf. *Journal of Sea Research* 197, 102470. <https://doi.org/10.1016/j.seares.2024.102470>
- 1141   Price, G.D., Bajnai, D., Fiebig, J., 2020. Carbonate clumped isotope evidence for latitudinal seawater  
1142           temperature gradients and the oxygen isotope composition of Early Cretaceous seas.  
1143           *Palaeogeography, Palaeoclimatology, Palaeoecology* 552, 109777.  
1144           <https://doi.org/10.1016/j.palaeo.2020.109777>



- 1145 Provoost, P., Bosch, S., Appeltans, W., OBIS, 2022. robis: Ocean Biodiversity Information System (OBIS)  
1146 Client.
- 1147 R Core Team, 2023. R: A Language and Environment for Statistical Computing. R Foundation for Statistical  
1148 Computing, Vienna, Austria.
- 1149 Ross, D.J., Skelton, P.W., 1993. Rudist formations of the Cretaceous: a palaeoecological, sedimentological  
1150 and stratigraphical review. *Sedimentology* 1 73–91.
- 1151 Schmitt, K.E., Huck, S., Krummacker, M., De Winter, N.J., Godet, A., Claeys, P., Heimhofer, U., 2022.  
1152 Radiolitic rudists: an underestimated archive for Cretaceous climate reconstruction? *Lethaia* 55,  
1153 1–21. <https://doi.org/10.18261/let.55.4.4>
- 1154 Schumann, P.D.D., 1995. Upper cretaceous rudist and stromatopod associations of Central Oman  
1155 (Arabian Peninsula). *Facies* 32, 189–202. <https://doi.org/10.1007/BF02536868>
- 1156 Shackleton, N.J., 1986. Paleogene stable isotope events. *Palaeogeography, Palaeoclimatology,*  
1157 *Palaeoecology* 57, 91–102.
- 1158 Skelton, P., 2018. Treatise Online no. 104: Part N, Volume 1, Chapter 26A: Introduction to the Hippuritida  
1159 (rudists): Shell structure, anatomy, and evolution. Treatise Online.
- 1160 Skelton, P.W., Wright, V.P., 1987. A Caribbean rudist bivalve in Oman-island-hopping across the Pacific in  
1161 the Late Cretaceous. *Palaeontology* 30, 505–529.
- 1162 stats package [WWW Document], 2019. URL  
1163 <https://www.rdocumentation.org/packages/stats/versions/3.6.2> (accessed 4.30.24).
- 1164 Steuber, T., 1999. Isotopic and chemical intra-shell variations in low-Mg calcite of rudist bivalves (Mollusca-  
1165 Hippuritacea): disequilibrium fractionations and late Cretaceous seasonality. *International Journal*  
1166 *of Earth Sciences* 88, 551–570.
- 1167 Steuber, T., Rauch, M., Masse, J.-P., Graaf, J., Malkoč, M., 2005. Low-latitude seasonality of Cretaceous  
1168 temperatures in warm and cold episodes. *Nature* 437, 1341–1344.  
1169 <https://doi.org/10.1038/nature04096>
- 1170 Stolper, D.A., Eiler, J.M., 2015. The kinetics of solid-state isotope-exchange reactions for clumped isotopes:  
1171 A study of inorganic calcites and apatites from natural and experimental samples. *American*  
1172 *Journal of Science* 315, 363–411. <https://doi.org/10.2475/05.2015.01>
- 1173 Sun, Y., Joachimski, M.M., Wignall, P.B., Yan, C., Chen, Y., Jiang, H., Wang, L., Lai, X., 2012. Lethally Hot  
1174 Temperatures During the Early Triassic Greenhouse. *Science* 338, 366–370.  
1175 <https://doi.org/10.1126/science.1224126>
- 1176 Surge, D., Lohmann, K.C., Dettman, D.L., 2001. Controls on isotopic chemistry of the American oyster,  
1177 *Crassostrea virginica*: implications for growth patterns. *Palaeogeography, Palaeoclimatology,*  
1178 *Palaeoecology* 172, 283–296.
- 1179 Swart, P.K., Oehlert, A.M., 2018. Revised interpretations of stable C and O patterns in carbonate rocks  
1180 resulting from meteoric diagenesis. *Sedimentary Geology* 364, 14–23.  
1181 <https://doi.org/10.1016/j.sedgeo.2017.12.005>
- 1182 Tehei, M., Madern, D., Franzetti, B., Zaccai, G., 2005. Neutron Scattering Reveals the Dynamic Basis of  
1183 Protein Adaptation to Extreme Temperature \*. *Journal of Biological Chemistry* 280, 40974–40979.  
1184 <https://doi.org/10.1074/jbc.M508417200>
- 1185 Tehei, M., Zaccai, G., 2007. Adaptation to high temperatures through macromolecular dynamics by  
1186 neutron scattering. *The FEBS Journal* 274, 4034–4043. <https://doi.org/10.1111/j.1742-4658.2007.05953.x>
- 1188 Ullmann, C.V., Korte, C., 2015. Diagenetic alteration in low-Mg calcite from macrofossils: a review.  
1189 *Geological Quarterly* 59, 3–20, doi: 10.7306/gq.1217. <https://doi.org/10.7306/gq.1217>
- 1190 Vaes, B., van Hinsbergen, D.J.J., van de Lagemaat, S.H.A., van der Wiel, E., Lom, N., Advokaat, E.L.,  
1191 Boschman, L.M., Gallo, L.C., Greve, A., Guilmette, C., Li, S., Lippert, P.C., Montheil, L., Qayyum, A.,  
1192 Langereis, C.G., 2023. A global apparent polar wander path for the last 320 Ma calculated from



1193 site-level paleomagnetic data. Earth-Science Reviews 245, 104547.  
 1194 <https://doi.org/10.1016/j.earscirev.2023.104547>  
 1195 van Hinsbergen, D.J., de Groot, L.V., van Schaik, S.J., Spakman, W., Bijl, P.K., Sluijs, A., Langereis, C.G.,  
 1196 Brinkhuis, H., 2015. A paleolatitude calculator for paleoclimate studies. PloS one 10, e0126946.  
 1197 Vansteenberge, S., de Winter, N.J., Sinnesael, M., Xueqin, Z., Verheyden, S., Claey, P., 2020. Benchtop  
 1198  $\mu$ XRF as a tool for speleothem trace elemental analysis: Validation, limitations and application on  
 1199 an Eemian to early Weichselian (125–97 ka) stalagmite from Belgium. Palaeogeography,  
 1200 Palaeoclimatology, Palaeoecology 538, 109460. <https://doi.org/10.1016/j.palaeo.2019.109460>  
 1201 Vellekoop, J., Kaskes, P., Sinnesael, M., Huygh, J., Déhais, T., Jagt, J.W.M., Speijer, R.P., Claey, P., 2022. A  
 1202 new age model and chemostratigraphic framework for the Maastrichtian type area (southeastern  
 1203 Netherlands, northeastern Belgium). nos 55, 479–501. <https://doi.org/10.1127/nos/2022/0703>  
 1204 Walliser, E.O., Schöne, B.R., 2020. Paleooceanography of the Late Cretaceous northwestern Tethys Ocean:  
 1205 Seasonal upwelling or steady thermocline? PLOS ONE 15, e0238040.  
 1206 <https://doi.org/10.1371/journal.pone.0238040>  
 1207 Wang, Y., Huang, C., Sun, B., Quan, C., Wu, J., Lin, Z., 2014. Paleo-CO<sub>2</sub> variation trends and the Cretaceous  
 1208 greenhouse climate. Earth-Science Reviews 129, 136–147.  
 1209 <https://doi.org/10.1016/j.earscirev.2013.11.001>  
 1210 Wichern, N.M.A., de Winter, N.J., Johnson, A.L.A., Goolaerts, S., Wesselingh, F., Hamers, M.F., Kaskes, P.,  
 1211 Claey, P., Ziegler, M., 2023. The fossil bivalve *Angulus benedeni benedeni*: a potential seasonally  
 1212 resolved stable-isotope-based climate archive to investigate Pliocene temperatures in the  
 1213 southern North Sea basin. Biogeosciences 20, 2317–2345. [https://doi.org/10.5194/bg-20-2317-](https://doi.org/10.5194/bg-20-2317-2023)  
 1214 2023  
 1215 World Sea Temperatures, C.G.S.T.-A.-C., 2024. Muscat Water Temperature [WWW Document]. World Sea  
 1216 Temperatures. URL <https://www.seatemperature.org/middle-east/oman/muscat.htm> (accessed  
 1217 5.24.24).  
 1218 World Wildlife Fund, 2020. The Living Planet Report 2020 [WWW Document]. URL  
 1219 <http://stats.livingplanetindex.org/> (accessed 2.19.21).  
 1220  
 1221
